# Supplementary material
Source: PubMed Central journal article supplement (PMC4213151)
Supplement: supp_tpc.114.127381_tpc127381_SupplementalData.pdf [file supp_tpc.114.127381_tpc127381_SupplementalData.pdf]

**A** *pLAT52-eGFP*

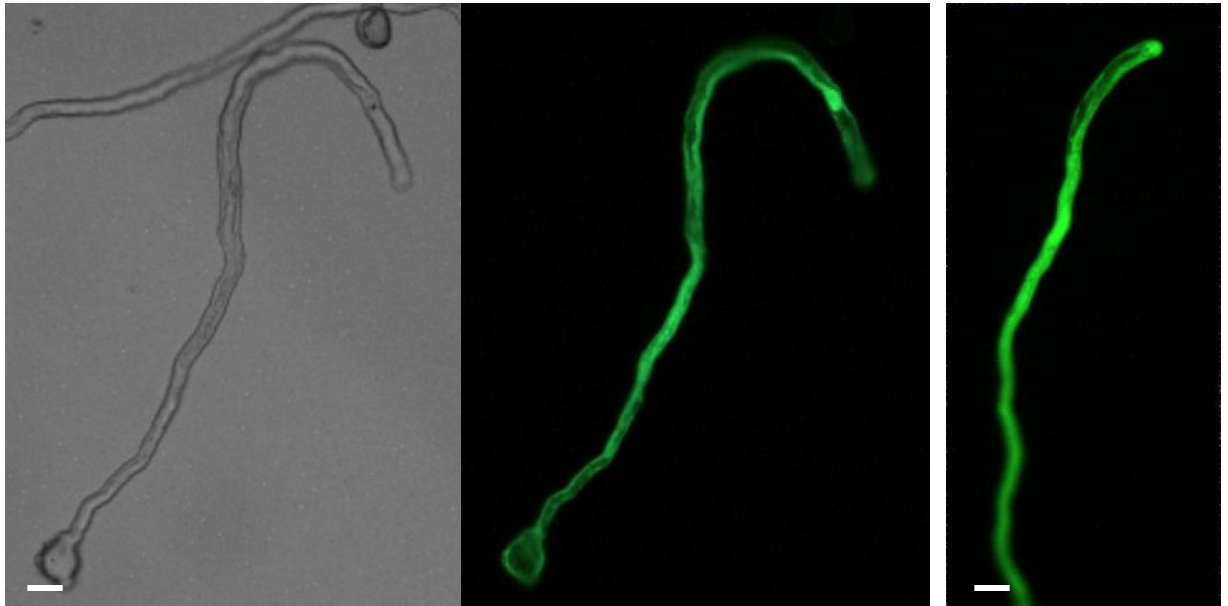

**B** *pLAT52-LePRK1-eGFP*

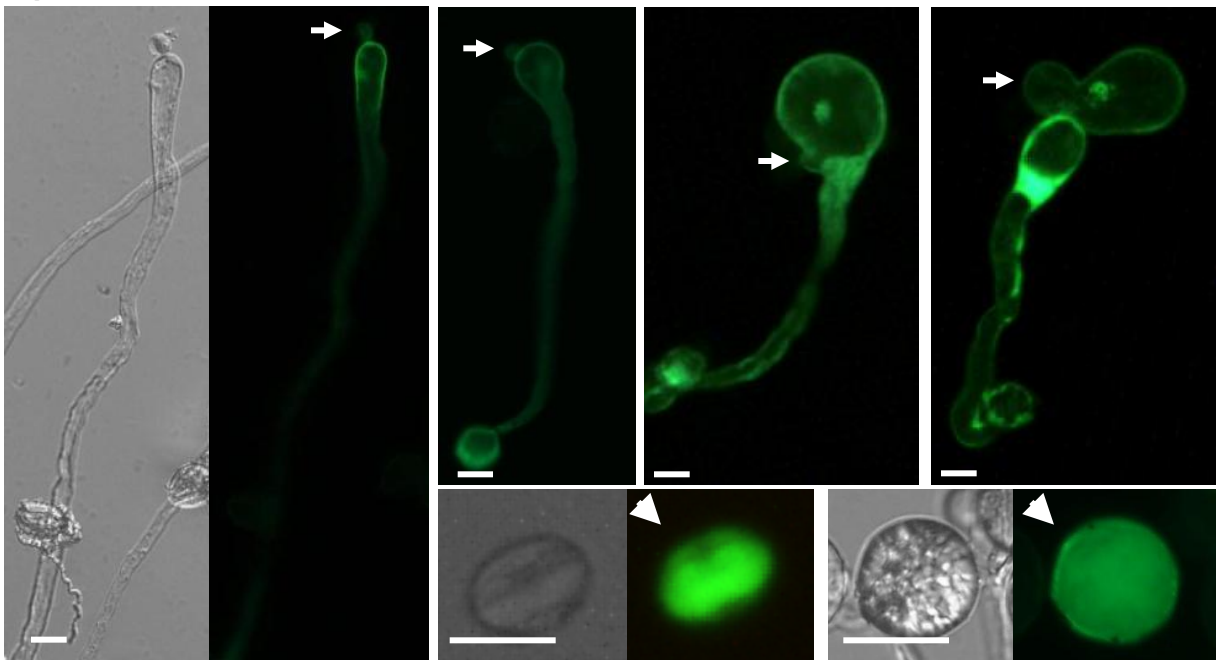

**Supplemental Figure 1.** Transient overexpression of LePRK1 in tomato pollen causes blebbing. Representative pollen and pollen tubes expressing *pLAT52-eGFP* (A) or *pLAT52-LePRK1-eGFP* (B). Arrows point to blebs. Arrowheads point to non-germinated pollen. Scale bar = 20  $\mu$ m.

**A** LePRK1-mRFP

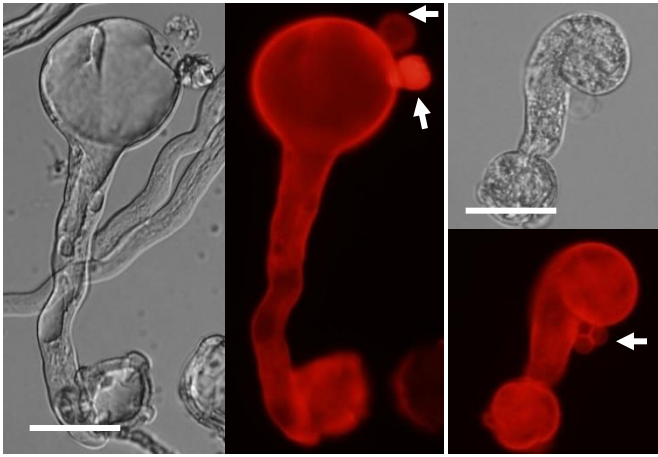

**B** LePRK1; eGFP

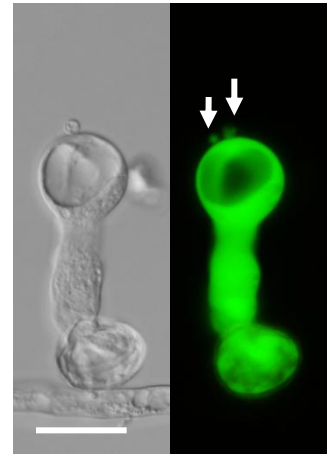

**C** LePRK1-eGFP

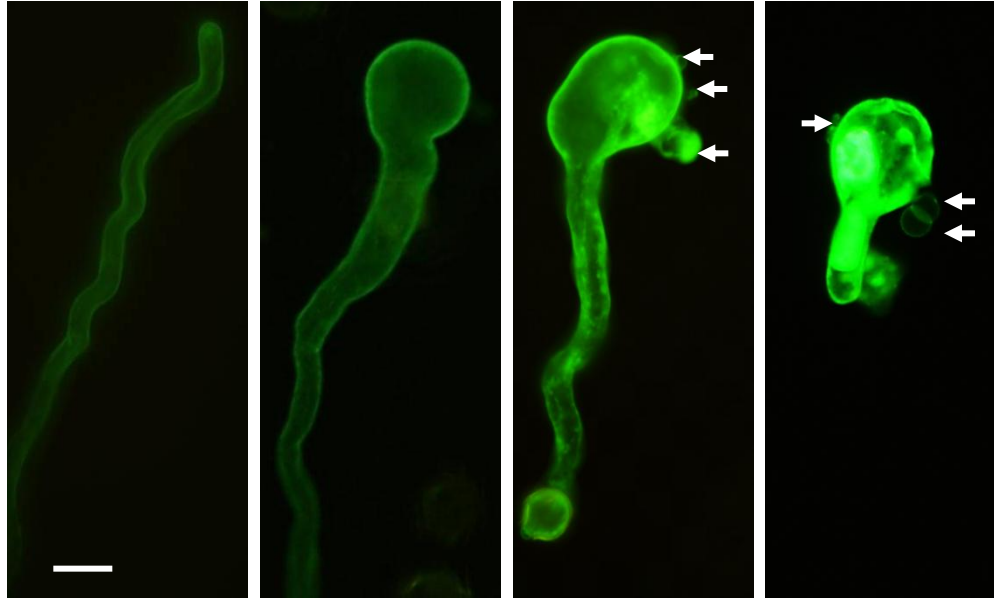

**D** Pollen tubes expressing LePRK1-eGFP driven by *LAT52* promoter

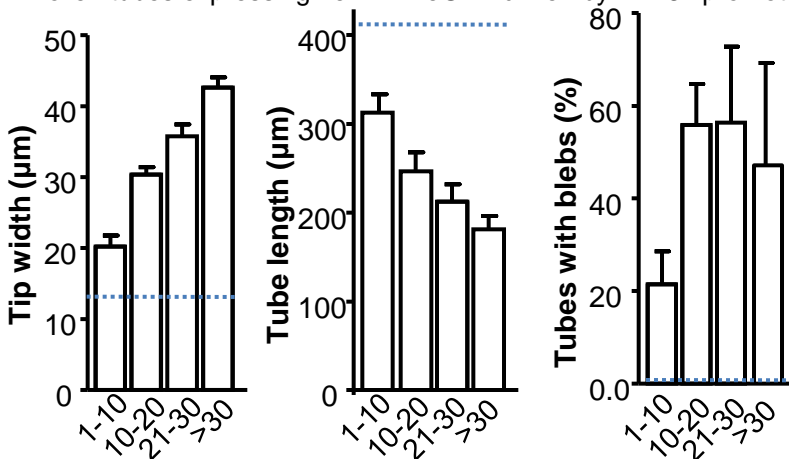

**E** driven by *LePRK1* promoter

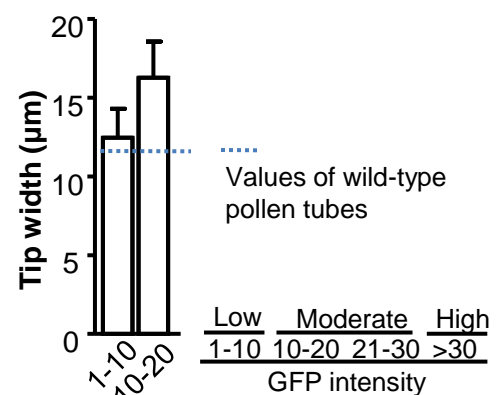

**Supplemental Figure 2.** Analysis of tobacco pollen tubes overexpressing LePRK1.

(A) Representative pollen tube expressing LePRK1-mRFP. (B) Representative pollen tube expressing LePRK1 and eGFP separately. (C) Representative images of pollen tubes transiently expressing LePRK1-eGFP at different levels, ranging from low (left) to high (right). Arrows point to blebs. Scale bar = 30 μm. (D) Measurements of pollen tubes expressing LePRK1-eGFP grouped based on their fluorescence intensity ranges (X-axis). All the genes in A to D were driven by the *LAT52* promoter. (E) Measurements of tip width of pollen tubes expressing LePRK1-eGFP driven by the native *LePRK1* promoter, note that these pollen tubes fell into the 1-10 and 10-20 intensity range categories. More than 20 pollen tubes were measured in each group. Error bars indicate SE.

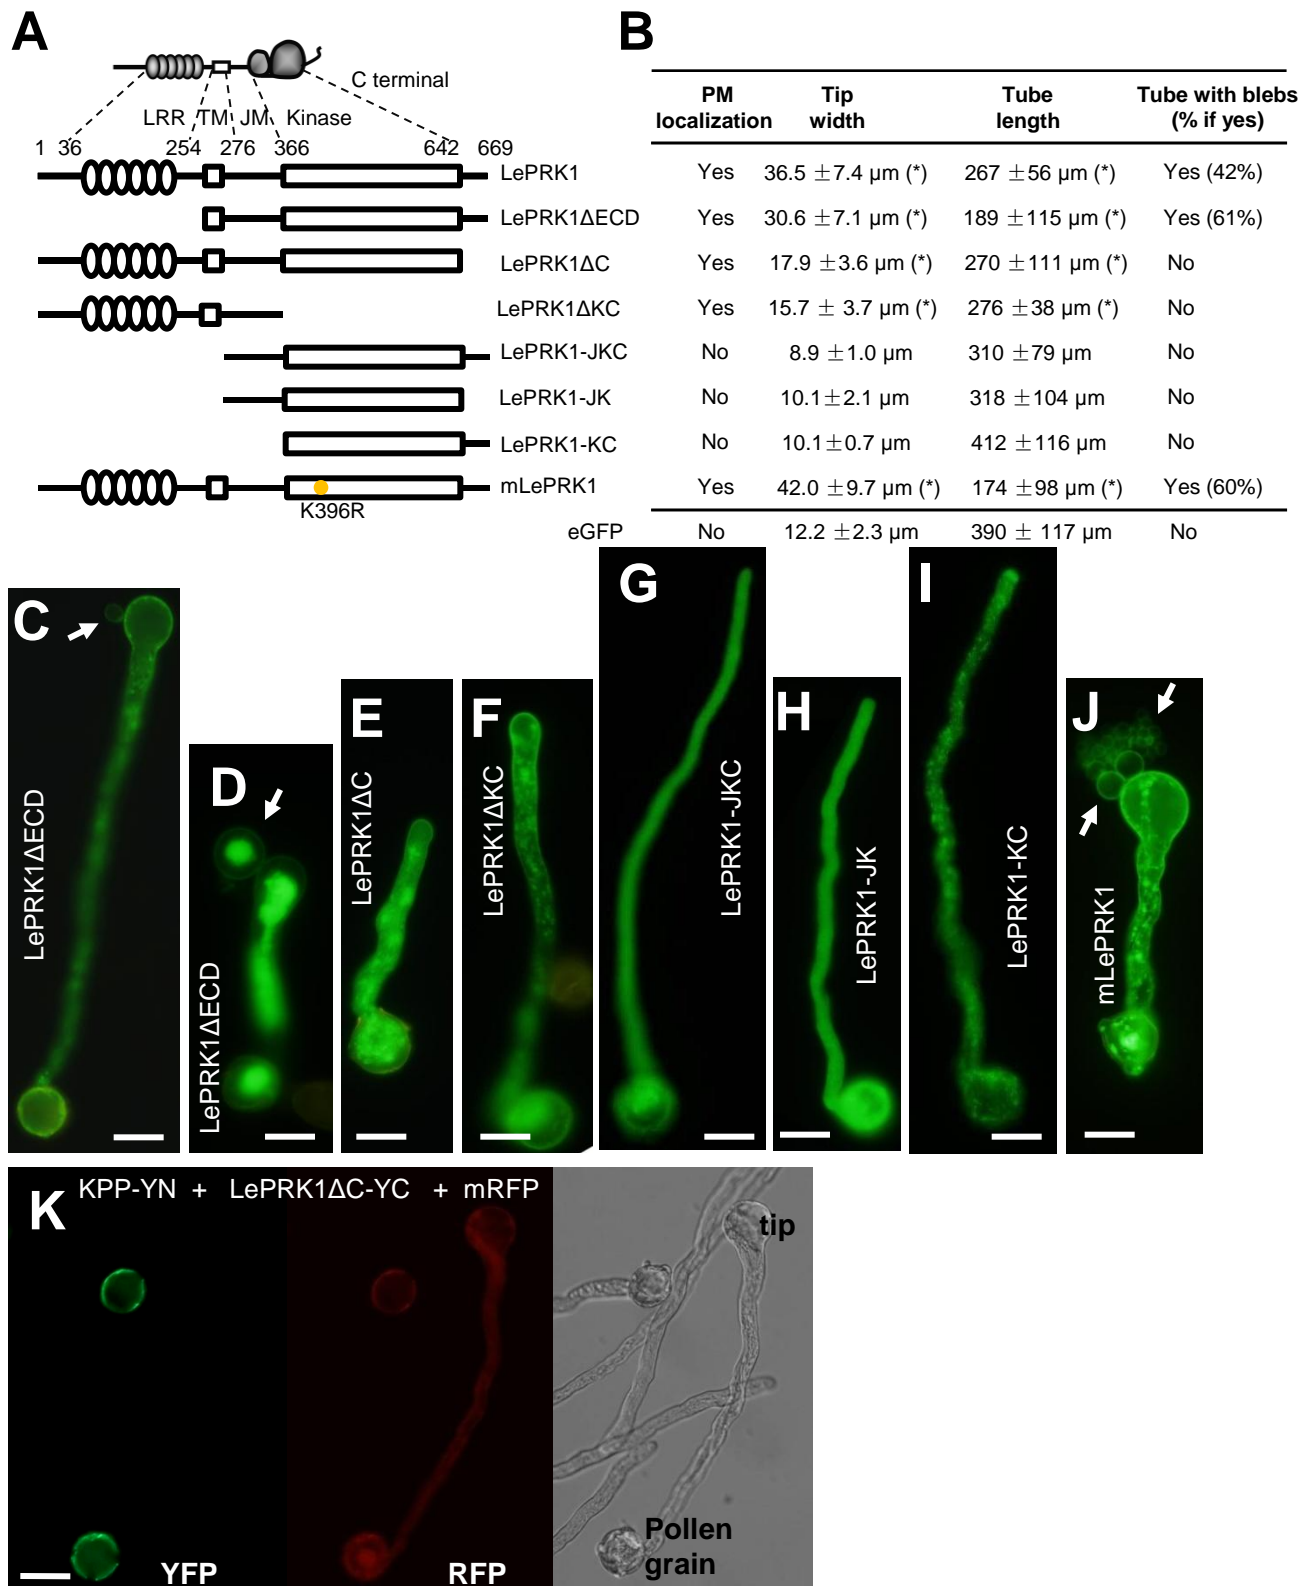

**Supplemental Figure 3.** The C-terminal tail and membrane localization of LePRK1, but not its kinase activity, are required for blebbing pollen tubes.

(A) Diagram of LePRK1 variants used in this work. The orange dot indicates the point mutation. (B) A summary table of the subcellular localization patterns and phenotypic measurements of the LePRK1 variants in transient overexpression. PM: plasma membrane. Yes under PM localization indicates at least partial PM localization. All were compared to pollen tubes expressing eGFP only. \*,  $P < 0.01$  (Student's  $t$  test).  $n = 3$  independent experiments. (C)-(J), Representative pollen tubes transiently overexpressing truncations or mutants as labeled. (K) A representative pollen tube expressing BiFC constructs as labeled. All genes were driven by the *LAT52* promoter. Arrows point to blebs. Scale bar = 30 μm.

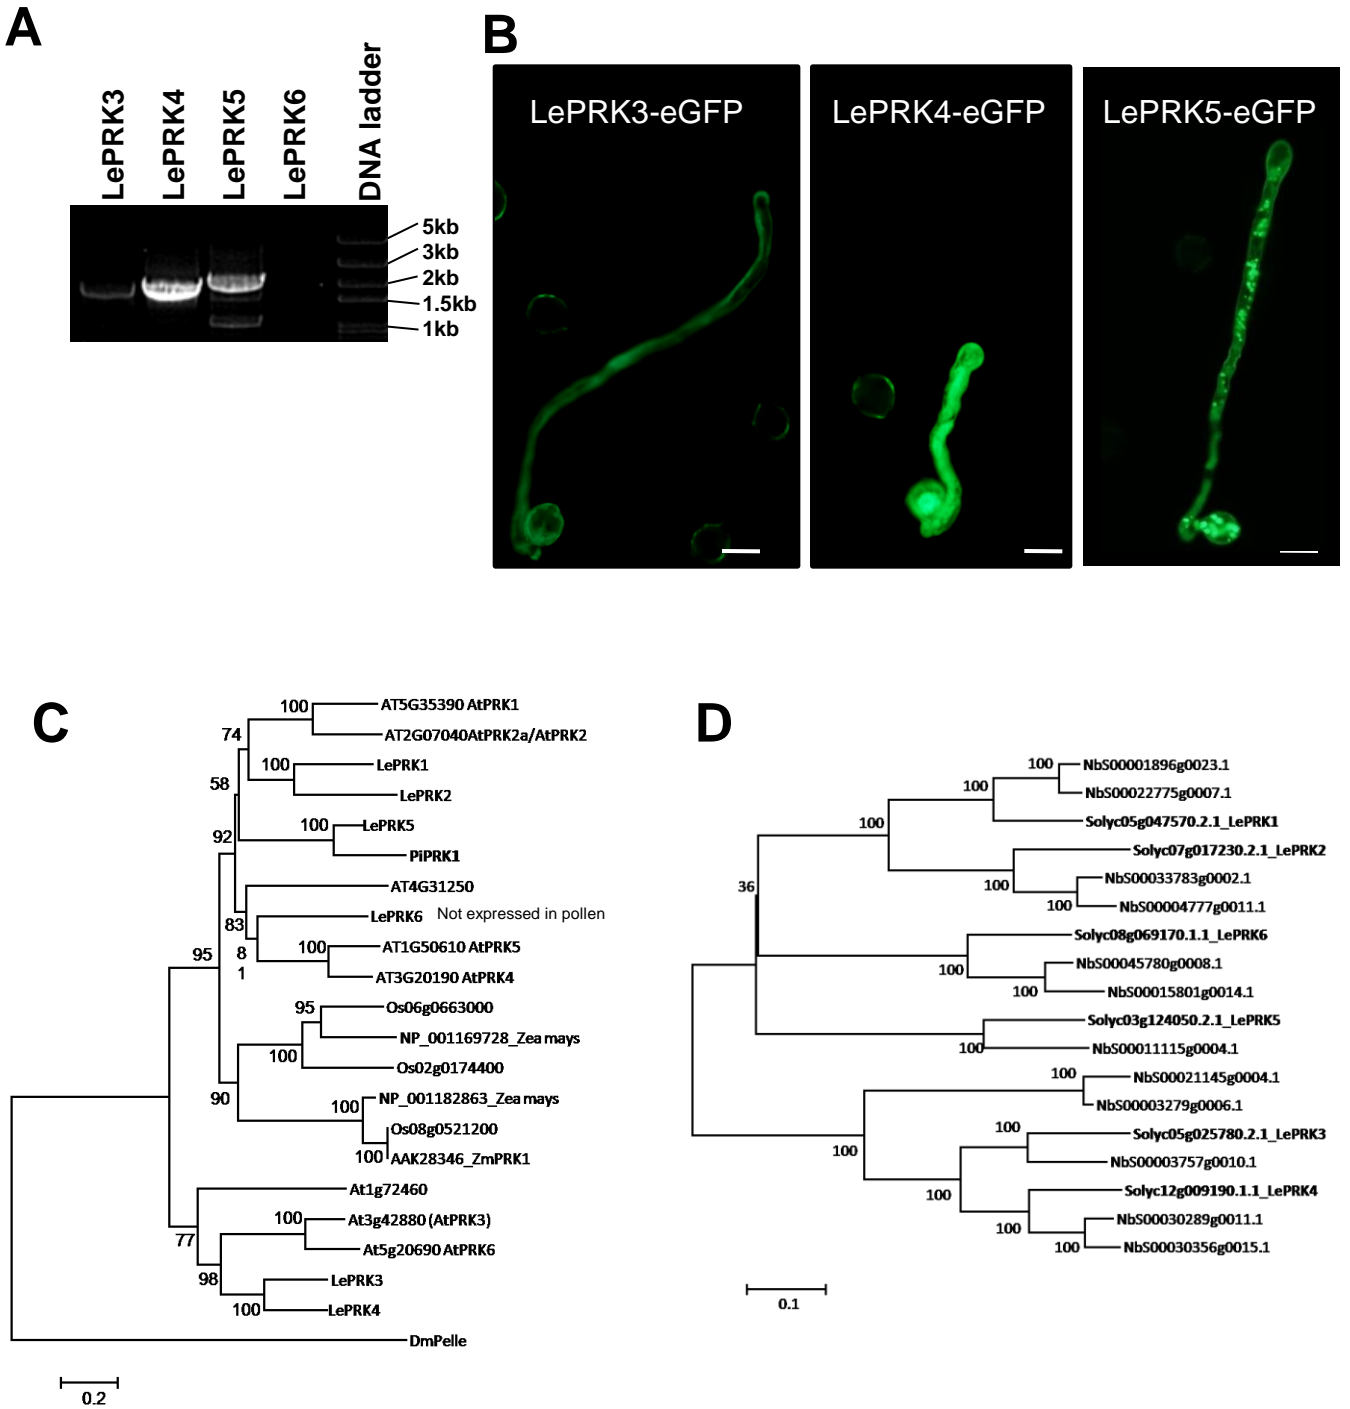

**Supplemental Figure 4.** Mild phenotypes when LePRK3, 4 or 5 are transiently overexpressed in tobacco pollen. (A) RT-PCR detection of LePRK3-6 expression in pollen tubes. Primers as below: LePRK3F1 ATGGCCGCTCATGTCTTATT; LePRK3R1 CATTAAATCTGTTATCTCTTCTATCC; LePRK4F1 ATGGCCGCCGTTCCCC; LePRK4R1 TATTAACTTATCTCTTCTATCCTCC; LePRK5F1 ATGACGGAGGTGGAGGATG; LePRK5R1 AACTCCATCATCAACTTGATCGT; LePRK6F1 ATGGCTTCTTCAGCAAGAAACC; LePRK6R1 AGCATTCTAGAAAAGGAAAAATCATC. (B) Pollen tubes transiently overexpressing LePRK3, LePRK4 or LePRK5. Scale bar = 30  $\mu$ m. (C) Phylogenetic tree of PRK proteins from tomato, Arabidopsis, rice and maize. PiPRK1 is the first identified PRK in this clade from *Petunia inflata* (Mu et al., 1994). AtPRKs are named after Chang et al., 2013. (D) Phylogenetic tree of tomato and *Nicotiana benthamiana* PRKs. The lengths of the branches are proportional to the expected numbers of amino acid substitutions per site; scale provided at the bottom. At, *Arabidopsis thaliana*, Le, *Solanum lycopersicum*, Os, *Oryza sativa*, Zm, *Zea mays*. Nb, *Nicotiana benthamiana*.

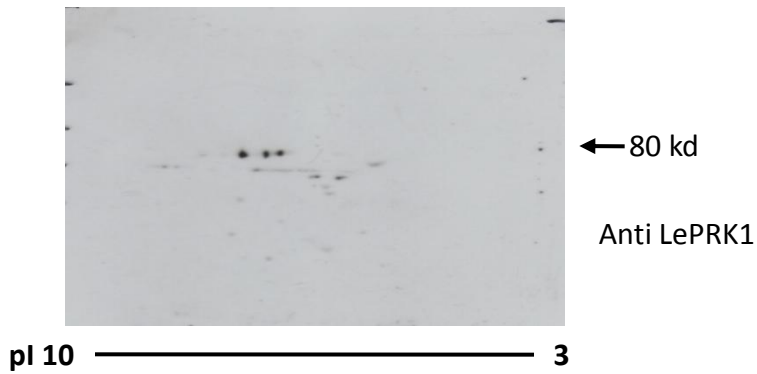

**Supplemental Figure 5.** LePRK1 is phosphorylated in tomato pollen.

Membrane fractions from mature pollen (200 µg) were separated by two dimensional gel electrophoresis (pI 10-3) and immunoblotted with anti-LePRK1 antibodies. The three spots recognized by anti-LePRK1 antibody are similar in molecular weight but different in pI, possibly representing different phosphorylated forms of LePRK1.

**A**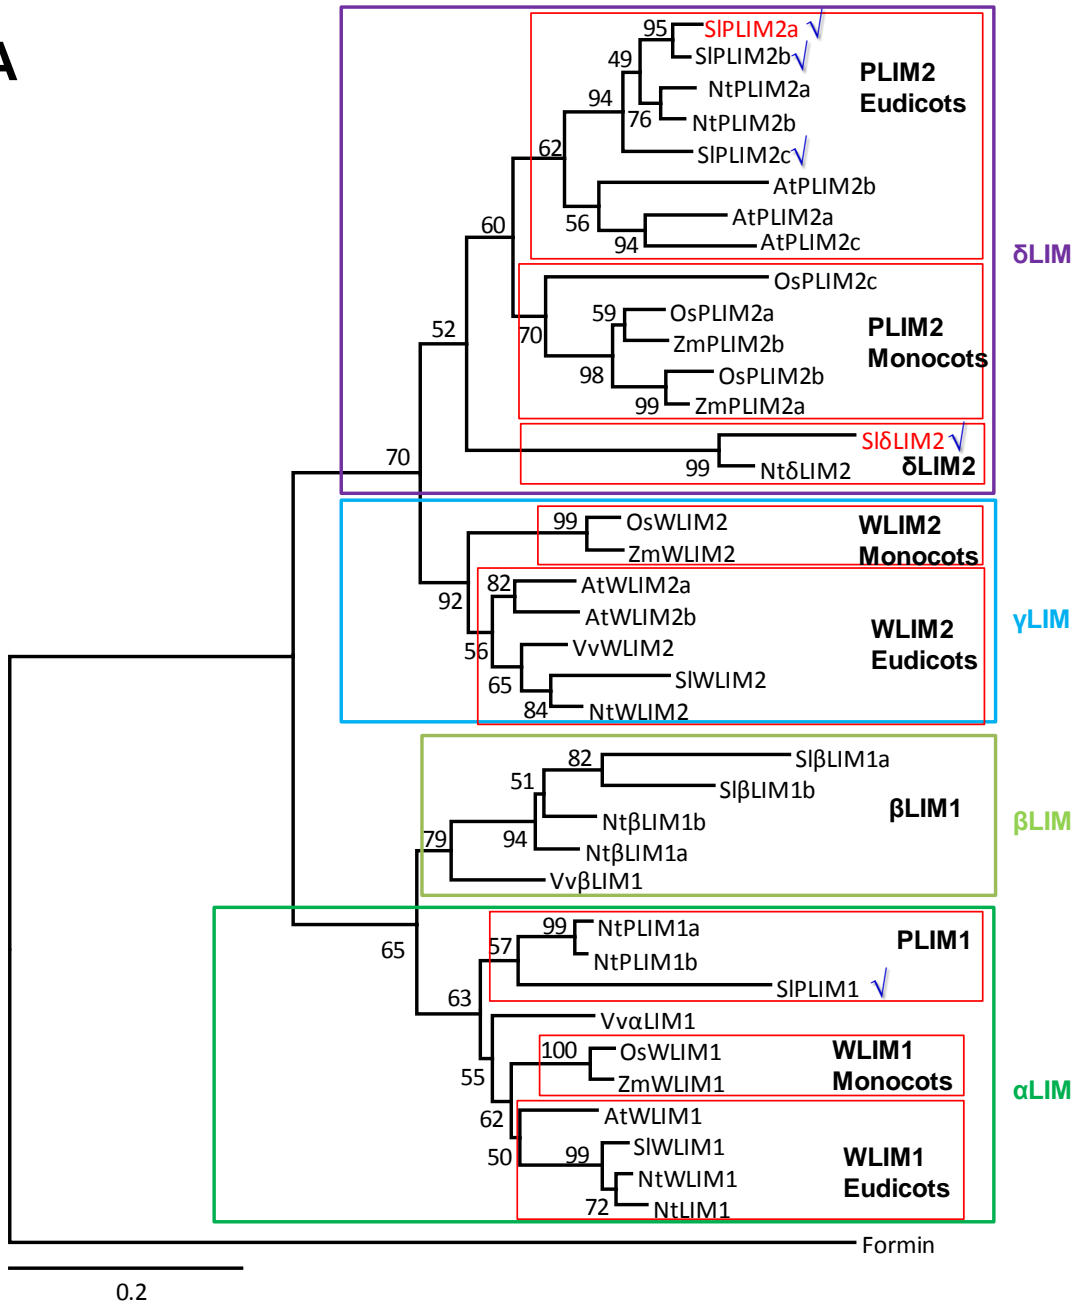**Supplemental Figure 6A.** Phylogenetic tree of plant LIM domain proteins.

Groups or subgroups are boxed. The lengths of the branches are proportional to the expected numbers of amino acid substitutions per site; scale at bottom. At, *Arabidopsis thaliana*, Nt, *Nicotiana tabacum*; Os, *Oryza sativa*, Sl, *Solanum lycopersicum*, Vv, *Vitis vinifera*; Zm, *Zea mays*. Formin is an outgroup. The two LIMs implicated in LePRK1 function are in red. The five tomato pollen-expressed LIMs are checked in the right.

|                   | Locus ID           |          | Locus ID  |          | Locus ID       |
|-------------------|--------------------|----------|-----------|----------|----------------|
| SIPLIM1 ✓         | Solyc11g044740.1.1 | AtWLIM1  | At1g10200 | OsWLIM1  | LOC_Os12g32620 |
| <b>SIPLIM2a</b> ✓ | Solyc01g094320.2.1 | AtWLIM2a | At2g39900 | OsLIM    | LOC_Os06g13030 |
| SIPLIM2b ✓        | Solyc10g017520.2.1 | AtWLIM2b | At3g55770 | OsWLIM2  | LOC_Os03g15940 |
| SIPLIM2c ✓        | Solyc05g049870.2.1 | AtPLIM2a | At2g45800 | OsPLIM2a | LOC_Os02g42820 |
| SIWLIM1           | Solyc04g077780.2.1 | AtPLIM2b | At1g01780 | OsPLIM2b | LOC_Os04g45010 |
| SIWLIM2           | Solyc05g052780.2.1 | AtPLIM2c | At3g61230 | OsPLIM2c | LOC_Os10g35930 |
| SIβLIM1a          | Solyc06g071310.2.1 |          |           |          |                |
| SIβLIM1b          | Solyc03g114000.2.1 |          |           |          |                |
| <b>SIδLIM2</b> ✓  | Solyc08g007940.2.1 |          |           |          |                |

## B KPP-YN + PLIM2a-YC + mRFP

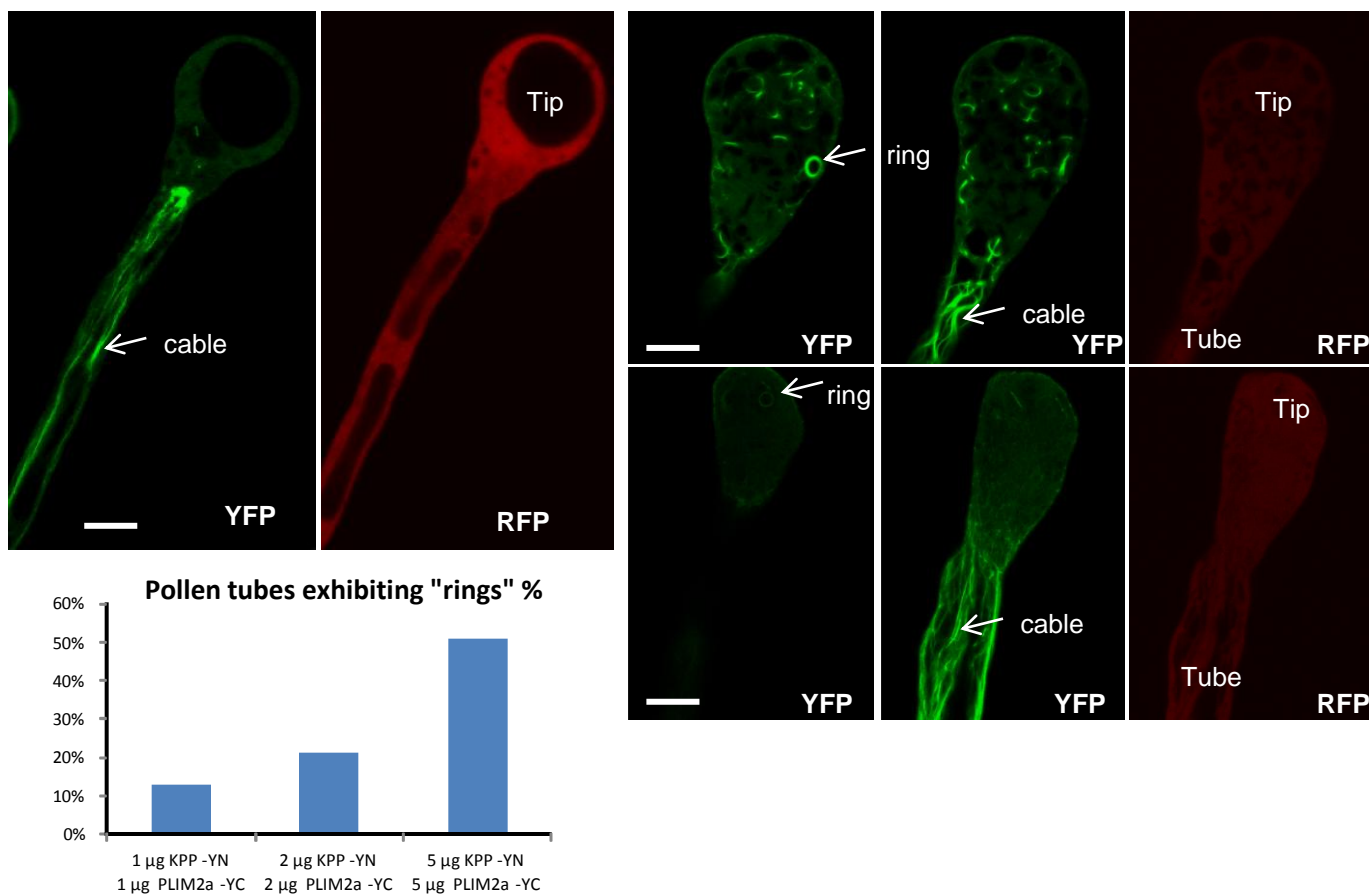

## C yeast two hybrid

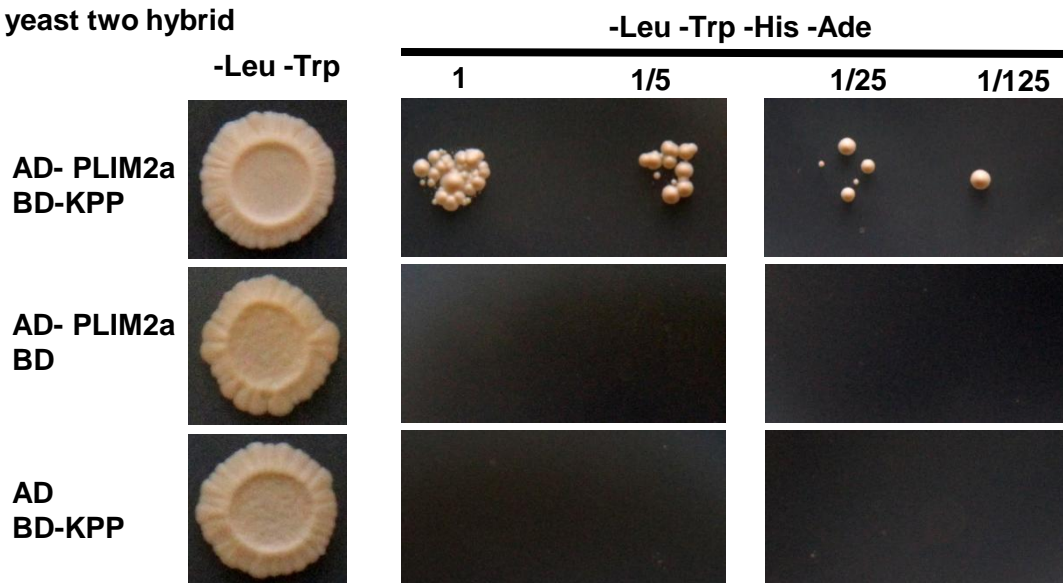

**Supplemental Figure 6B-C.** B. Confocal images at different planes of representing tobacco pollen tubes expressing BiFC constructs assaying PLIM2a-KPP interaction, mRFP channel was shown to help view the whole pollen tube tip region. Scale bar = 10  $\mu$ m. C. Yeast two hybrid assay showing PLIM2a-KPP interaction.

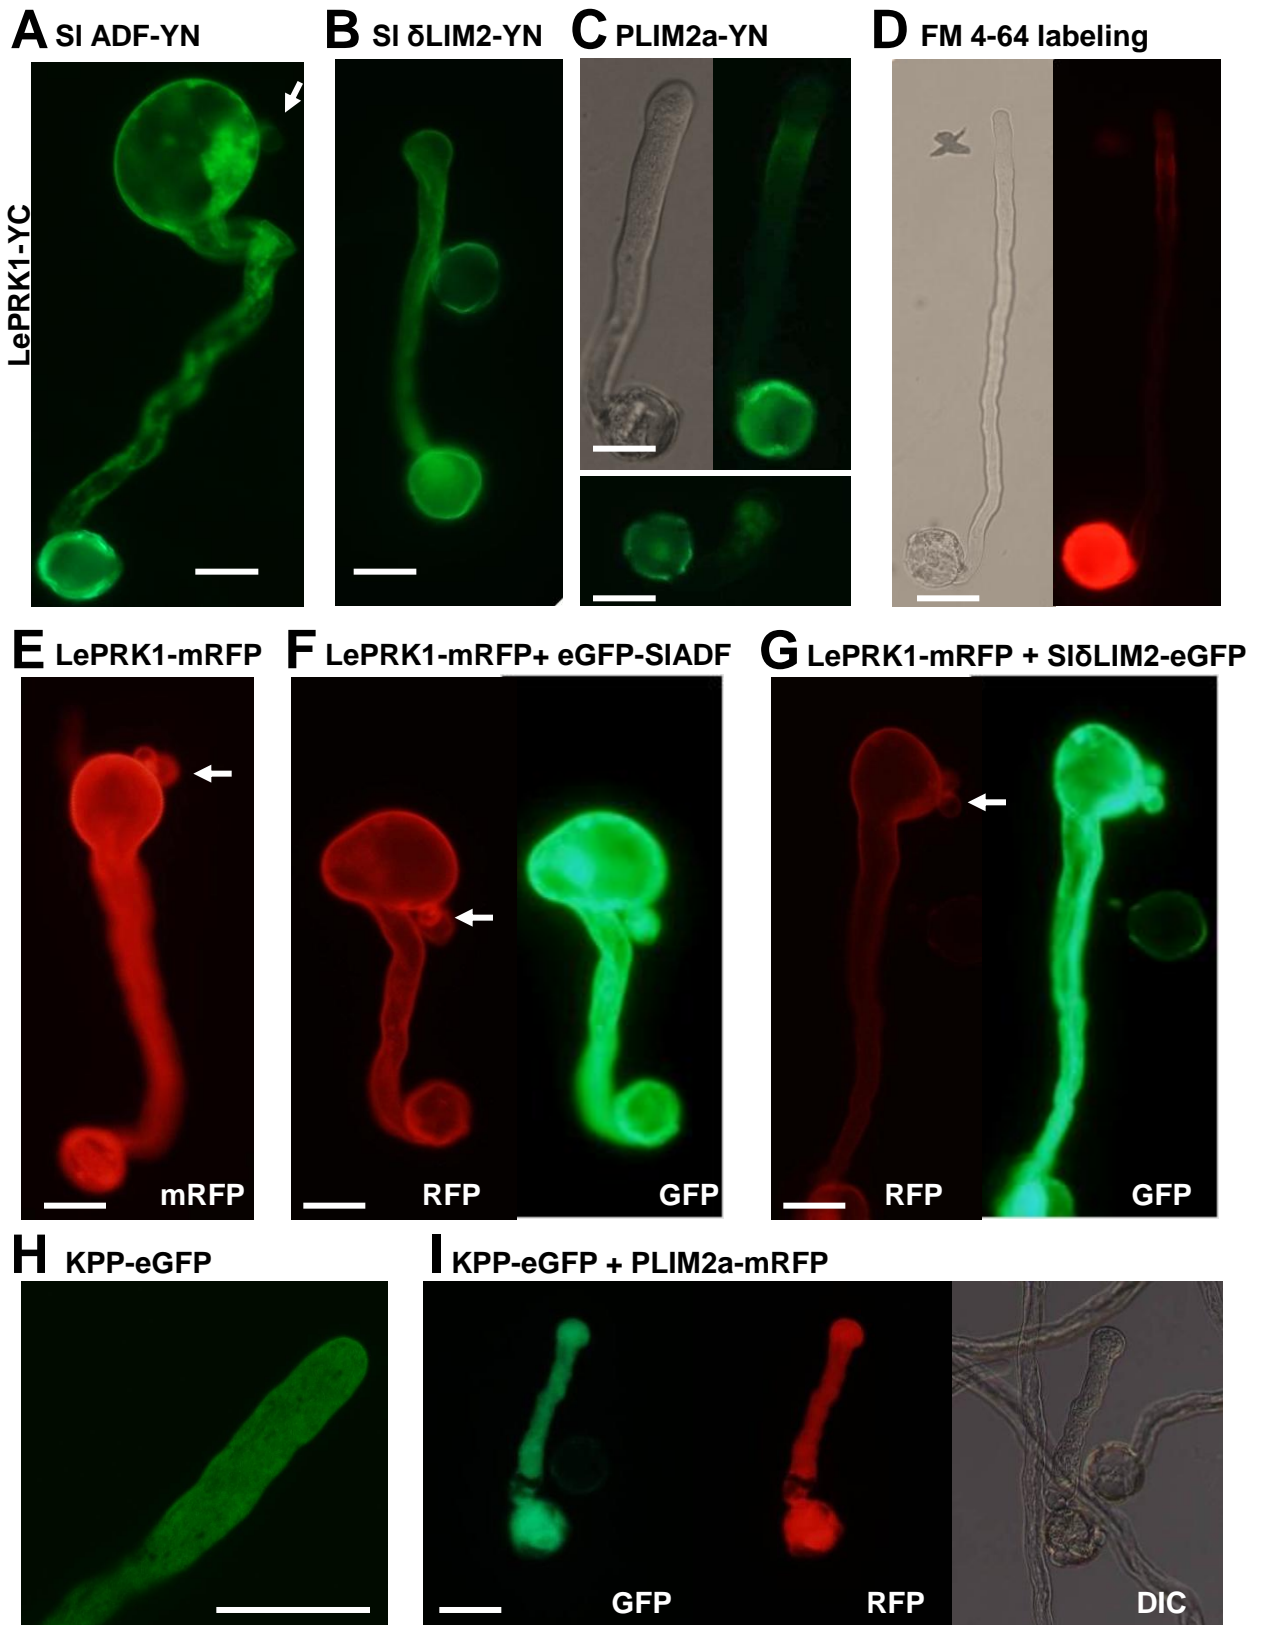

**Supplemental Figure 7.** SI ADF and SI  $\delta$ LIM2 form a complex with LePRK1 but neither interferes with the pollen tube blebbing caused by LePRK1 overexpression.

(A)-(C) Representative pollen tubes co-expressing BiFC constructs LePRK1-YC with SIADF-YN (A), SI $\delta$ LIM2-YN (B) or PLIM2a (C). (D) Representative FM 4-64 labeling of a tobacco pollen tube.

(E) Representative pollen tube overexpressing LePRK1-mRFP. (F) and (G) Representative pollen tubes overexpressing LePRK1-mRFP and eGFP-SIADF (F) or SI $\delta$ LIM2-eGFP (G). (H) and (I) Representative tobacco pollen tubes transiently expressing KPP-eGFP (H) or KPP-eGFP and PLIM2a-mRFP (I). Arrows indicate blebs. Scale bar = 30  $\mu$ m.



**A** LePRK1-eGFP + PLIM2a-mRFP

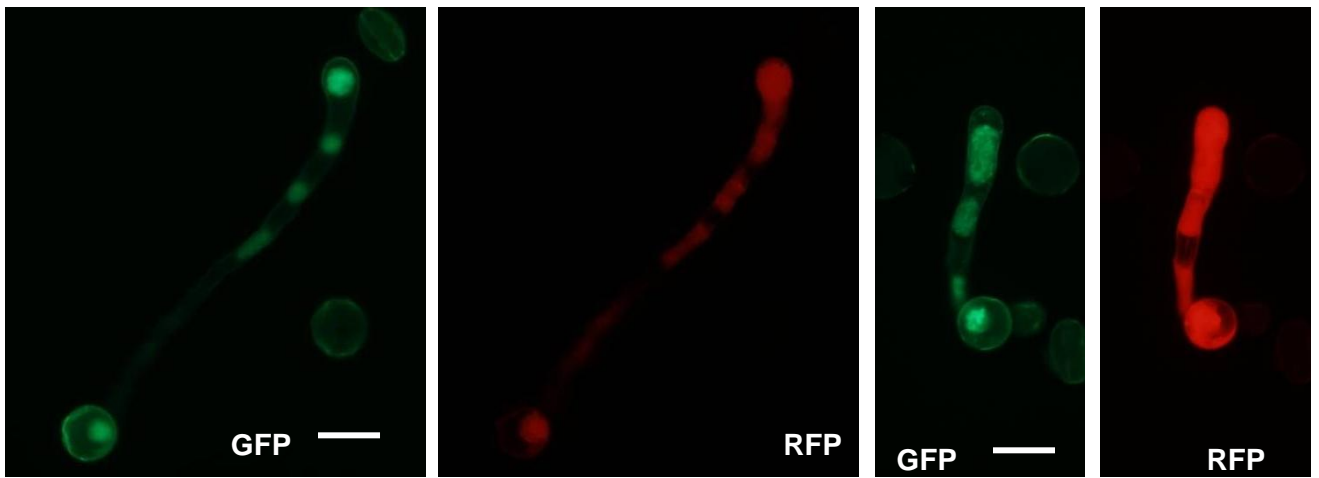

**B** LePRK1-eGFP + PLIM2b-mRFP

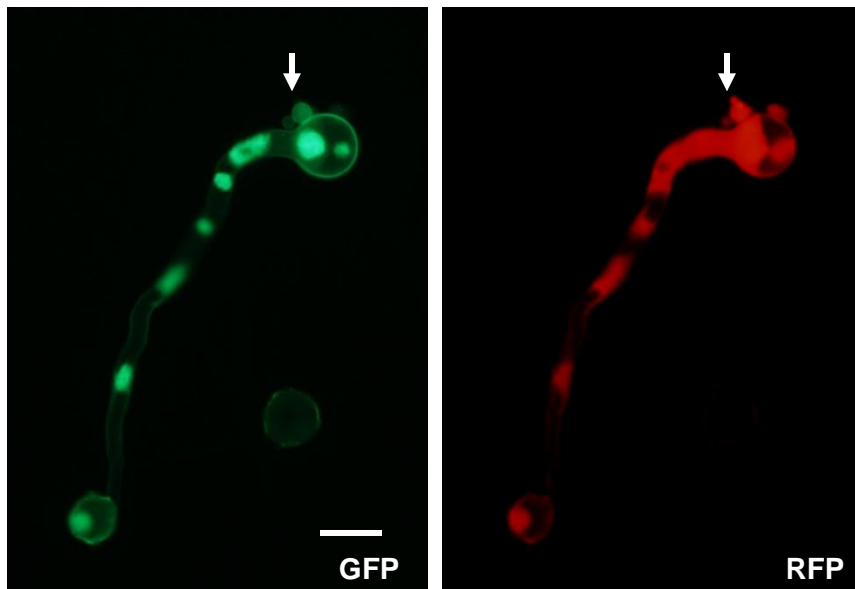

**C** LePRK1-eGFP + PLIM2c-mRFP

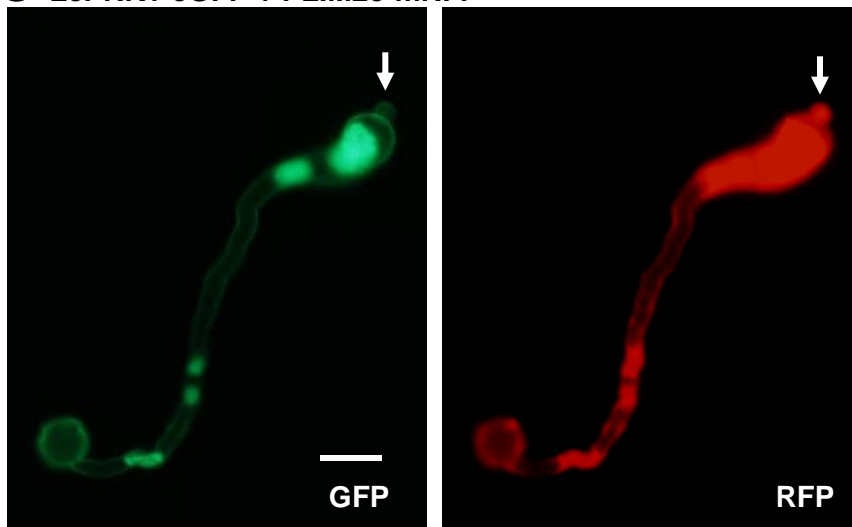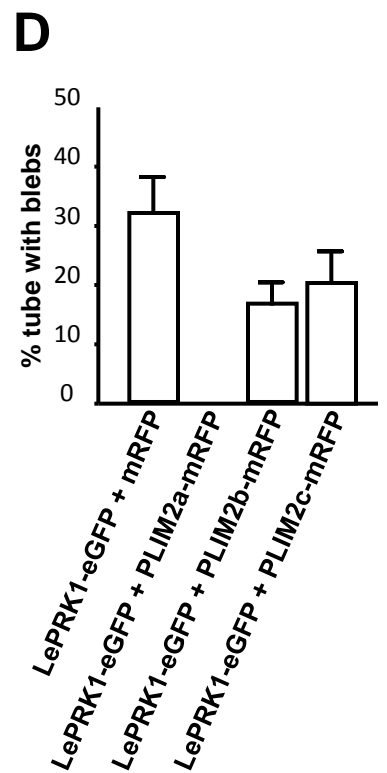

**Supplemental Figure 8.** PLIM2b and PLIM2c did not abolish pollen tube blebbing when transiently co-expressed with LePRK1.

(A)-(C) Representative tobacco pollen tubes expressing the denoted constructs. Arrows indicate blebs. Scale bar = 30  $\mu$ m. (D) Measurements of blebbing tubes. Error bars indicate SD.

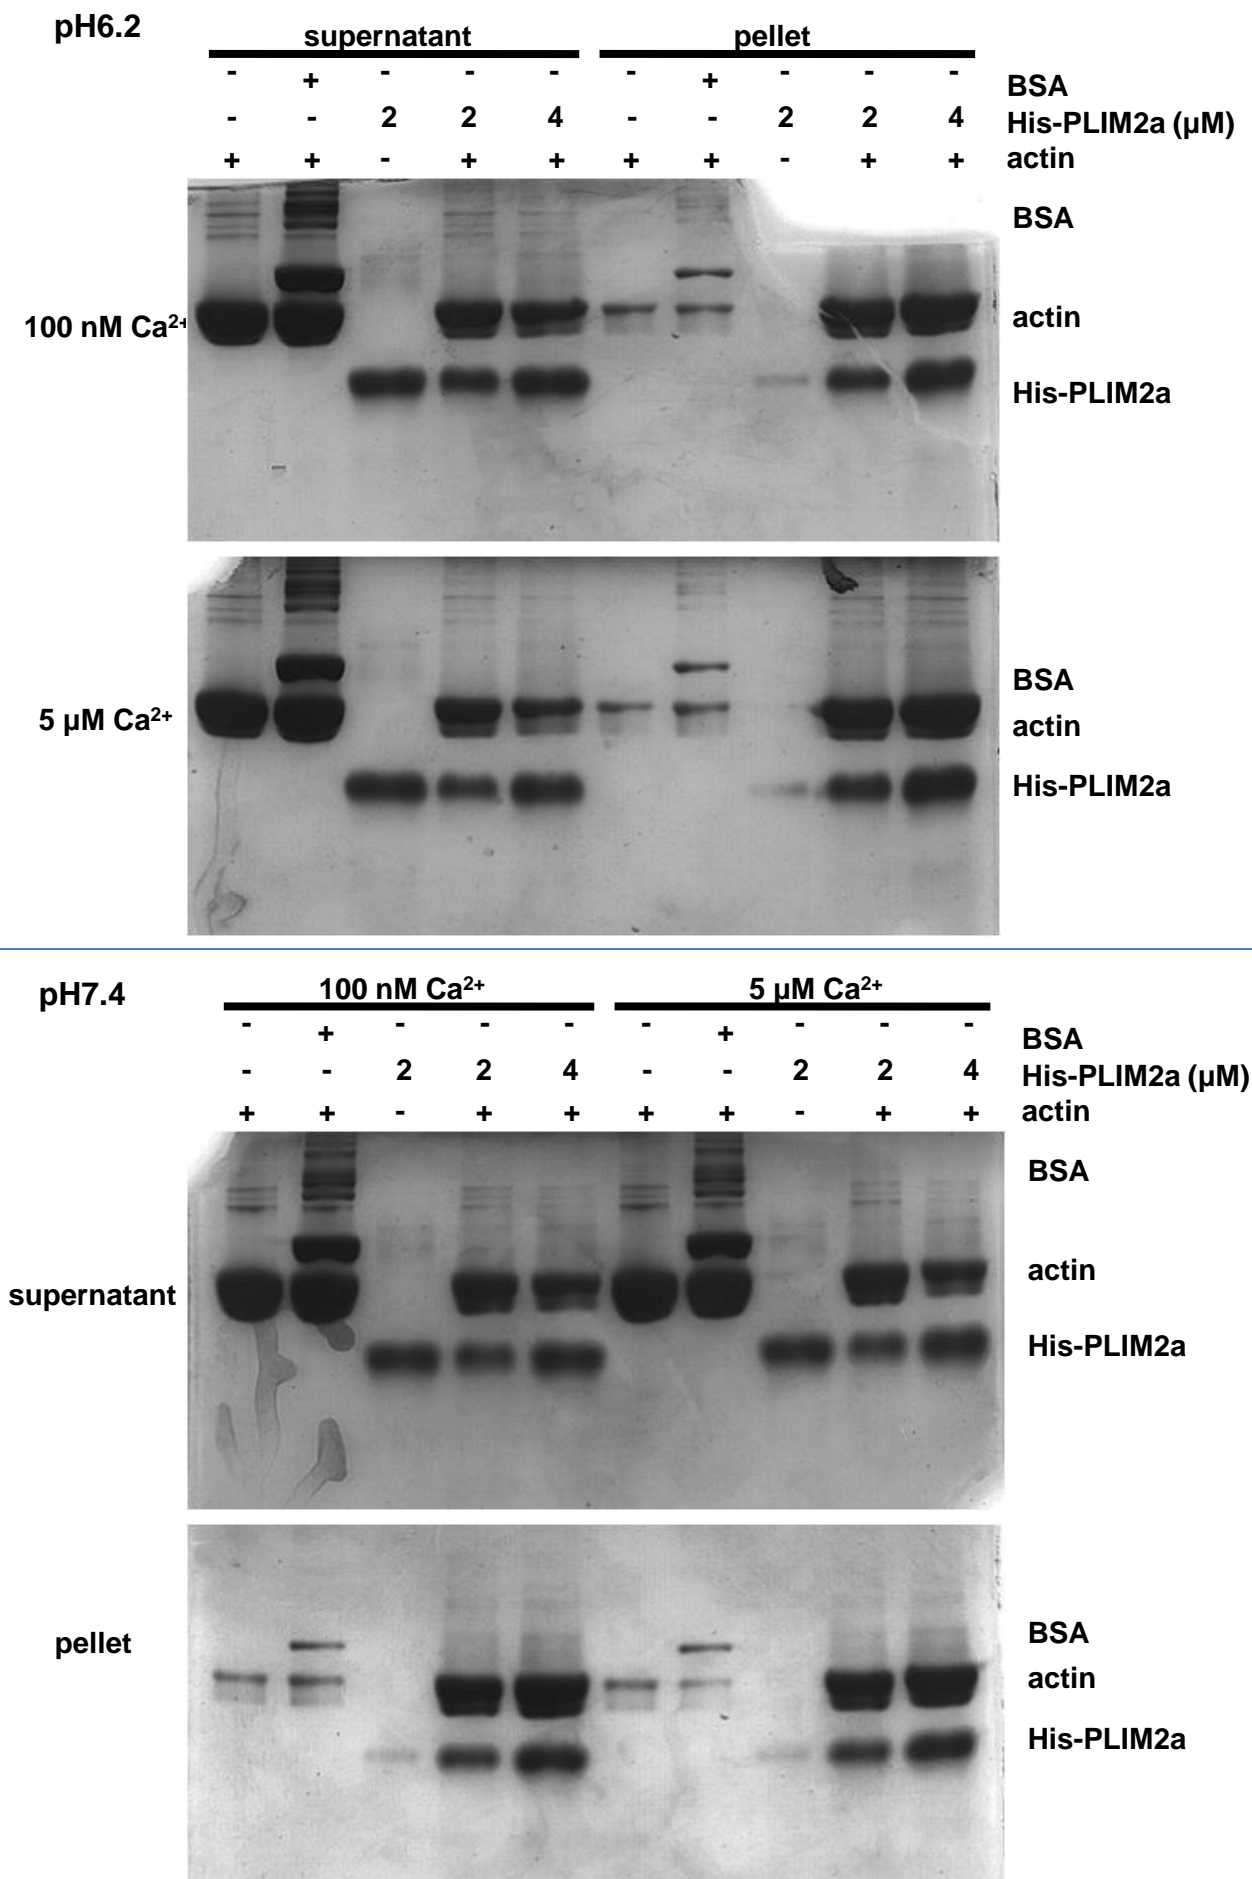

**Supplemental Figure 9.** Low speed sedimentation assay for actin bundling activity assessment. Low-speed co-sedimentation 15,000 g

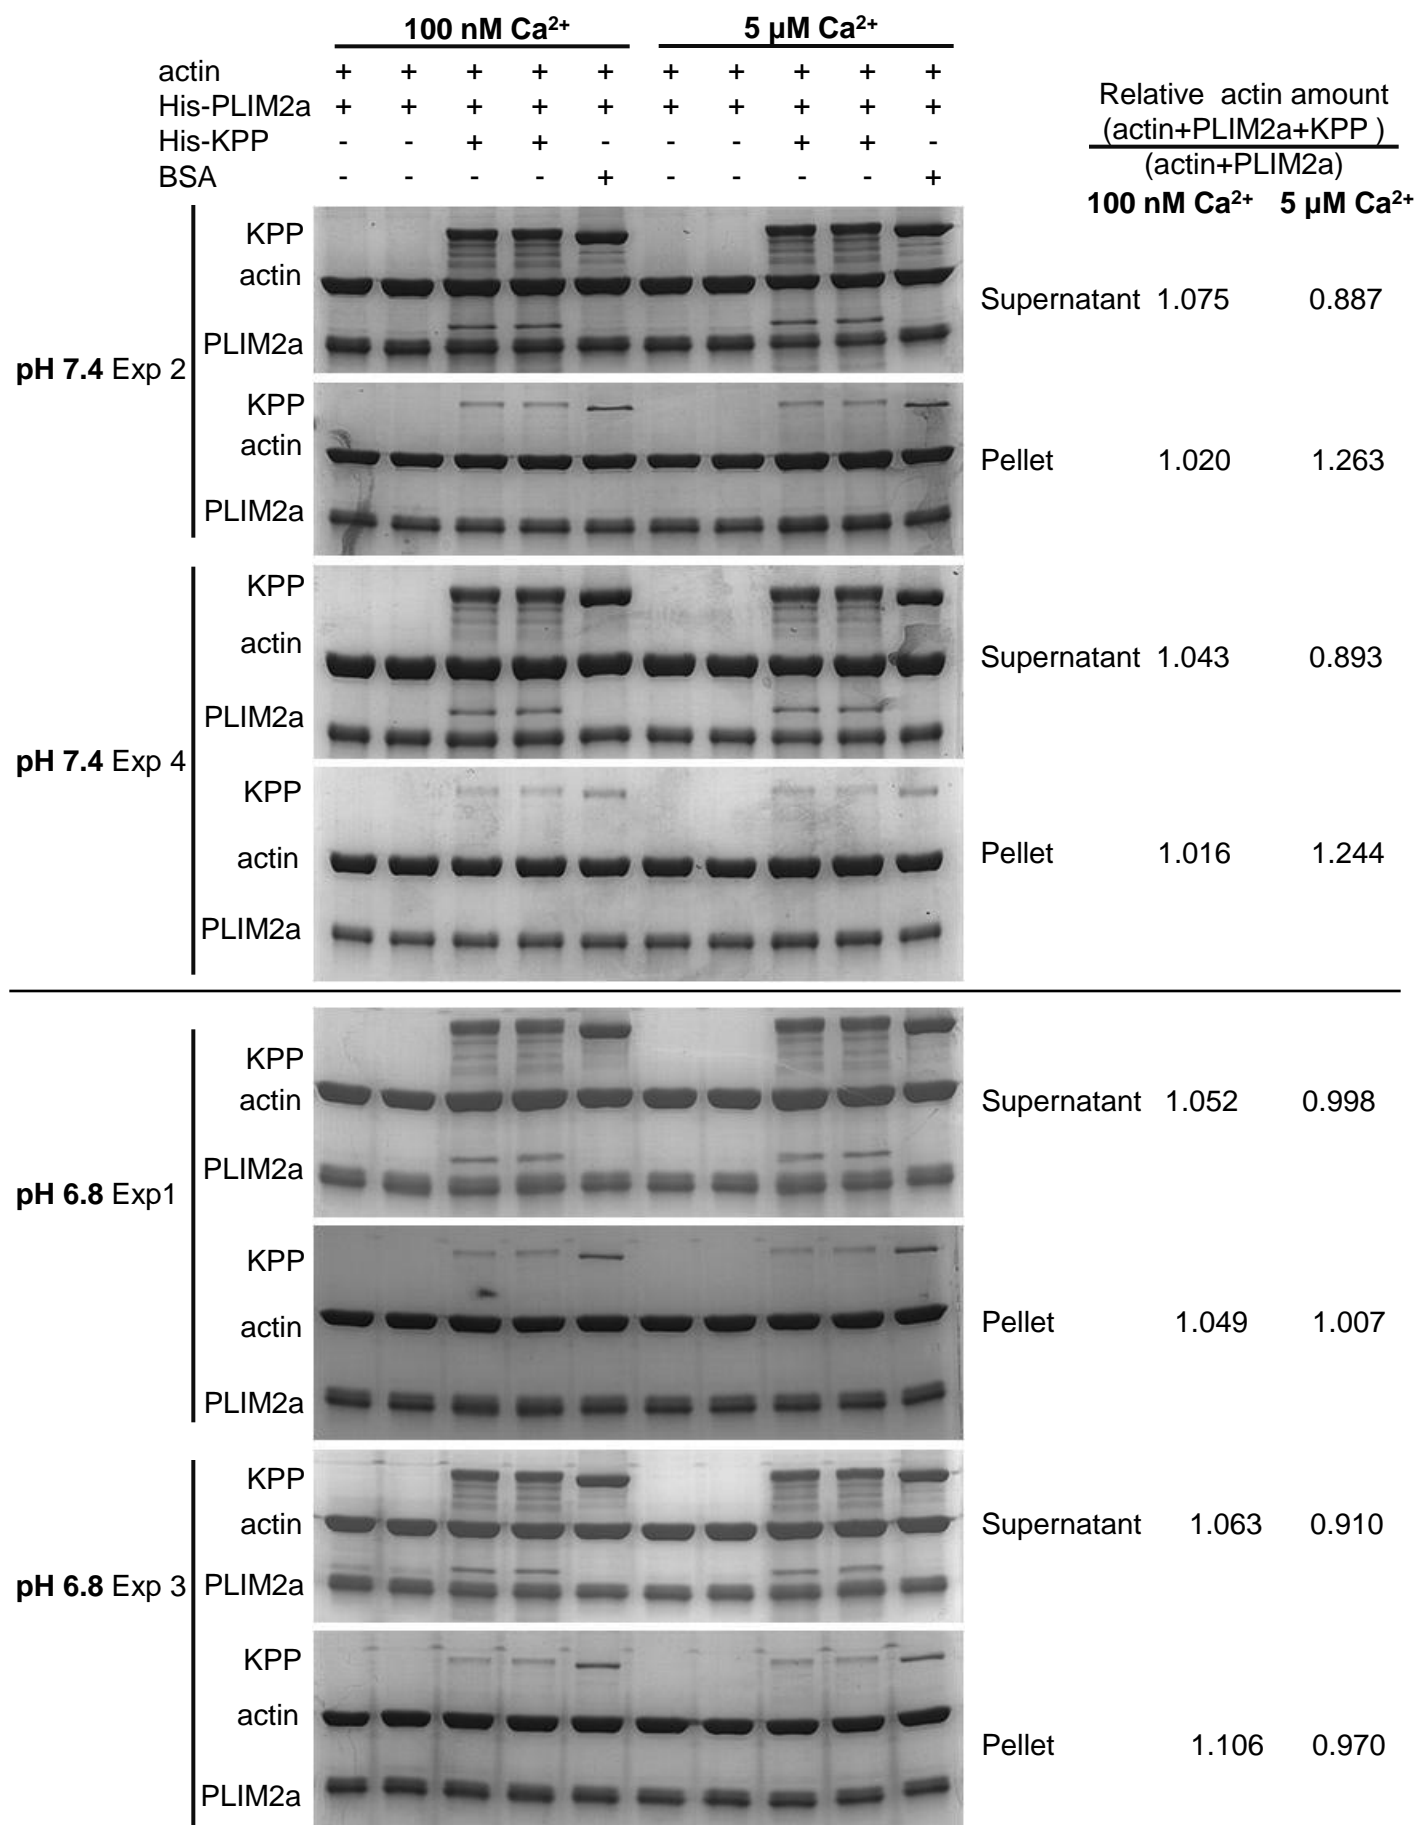

**Supplemental Figure 10.** Low speed sedimentation assay for actin bundling promotion effects. His-KPP, His-PLIM2a, BSA 2 μM each.

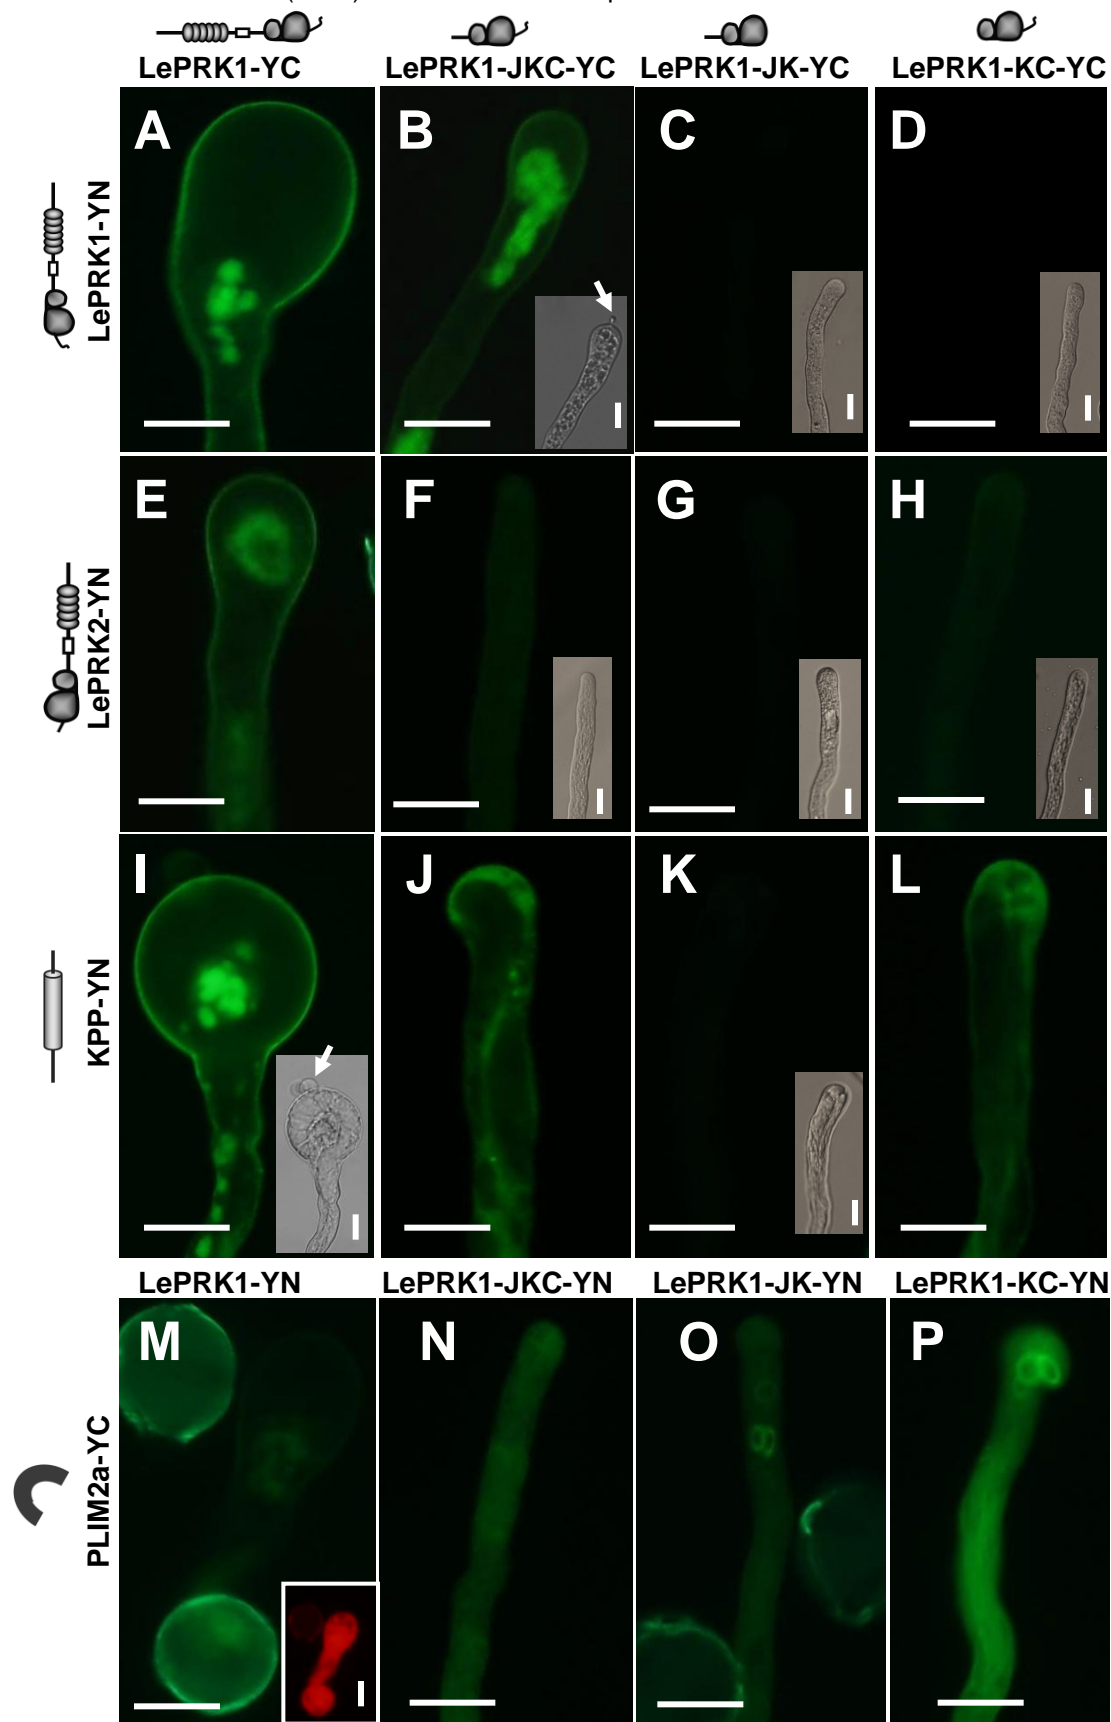

**Supplemental Figure 11.** LePRK1 lacking the JM or C-terminal prevents LePRK1 from forming a complex with itself, but facilitates LePRK1 forming a complex with PLIM2a and the formation of ring-like structures. (A) to (P) Representative pollen tubes coexpressing BiFC construct pairs, one fused with full length or truncated LePRK1 (as indicated by the diagram at the top), and the other fused with full length LePRK1, LePRK2, KPP or PLIM2a, (as indicated on the left). Insets show the DIC pictures or co-expressed mRFP pictures to visualize the contour of pollen tubes in cases where BiFC signals are weak. Arrows point to blebs which may not be visible in YFP channel. All genes were expressed transiently in tobacco pollen tubes and driven by the *LAT52* promoter. Scale bar = 20  $\mu\text{m}$ . 12

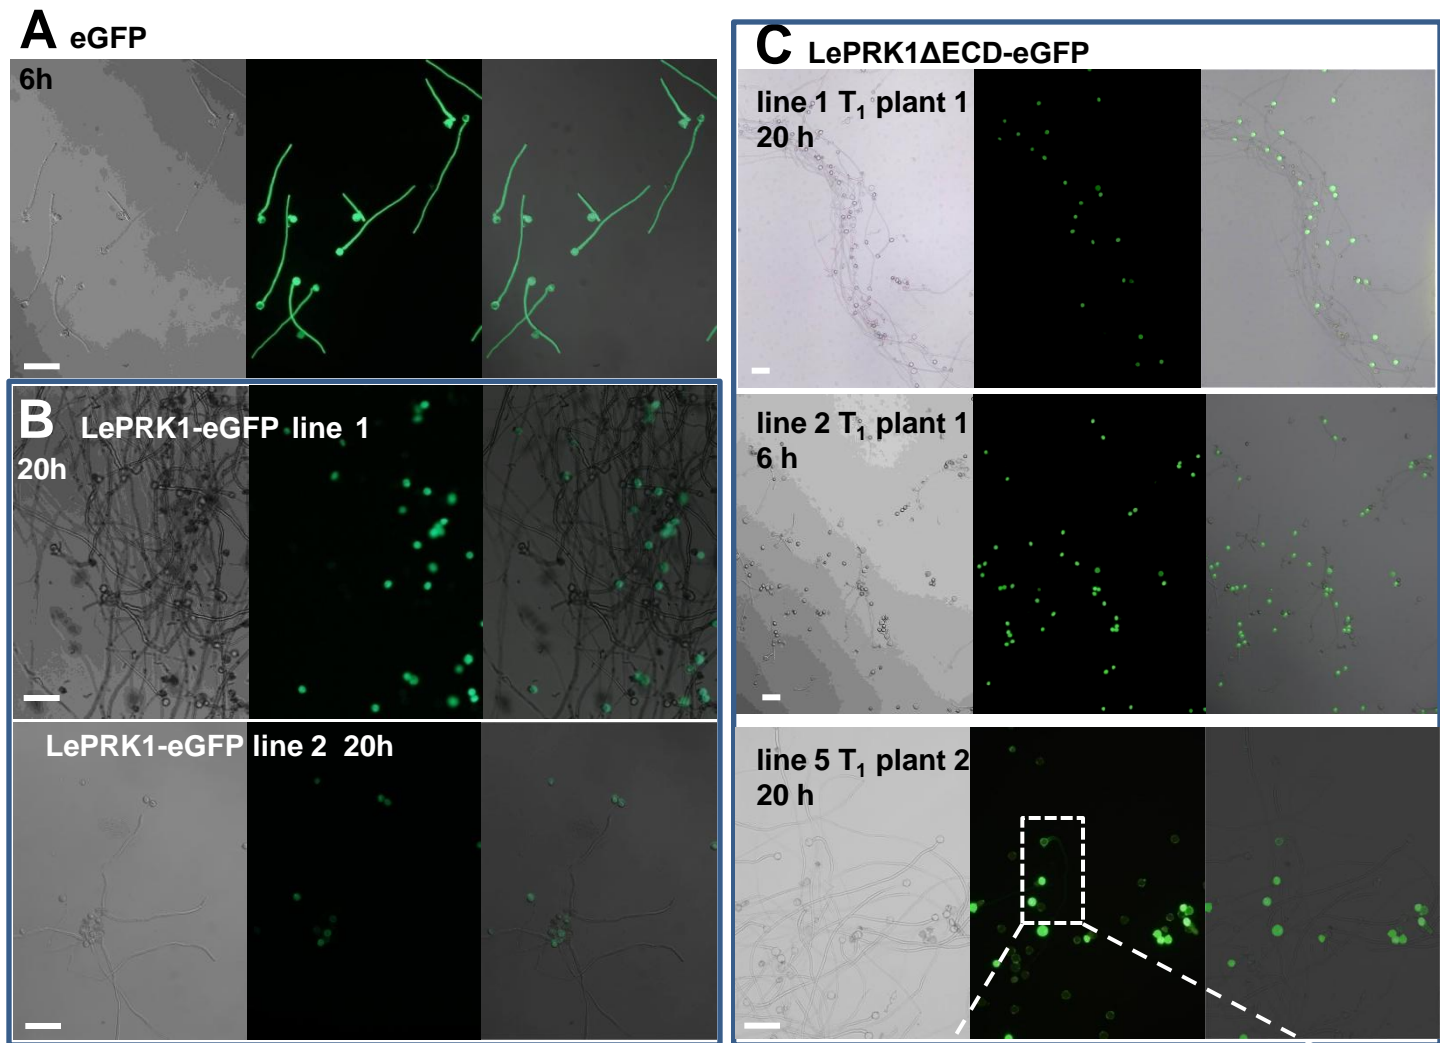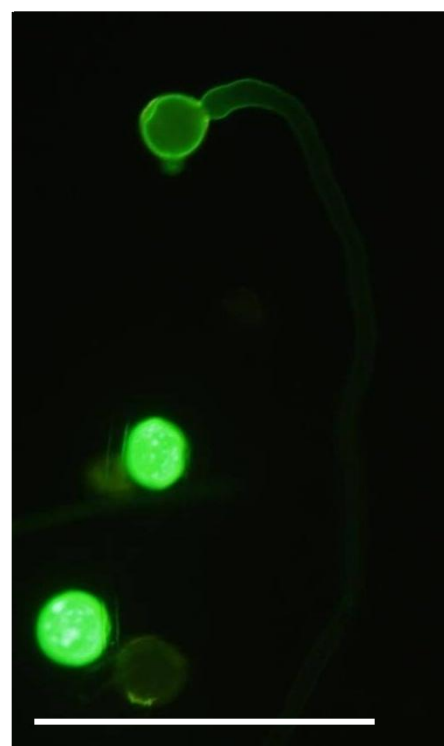

**Supplemental Figure 12.** Pollen of transgenic tomato plants overexpressing LePRK1-eGFP or LePRK1 $\Delta$ ECD-eGFP did not germinate.

(A) Transgenic pollen tubes expressing only eGFP.

(B) Transgenic pollen expressing LePRK1-eGFP.

(C) Transgenic pollen expressing LePRK1 $\Delta$ ECD-eGFP. The boxed area is enlarged in the bottom, showing a rare tube; note that the fluorescence is only located at the shank near the grain. Scale bar = 100  $\mu$ m.

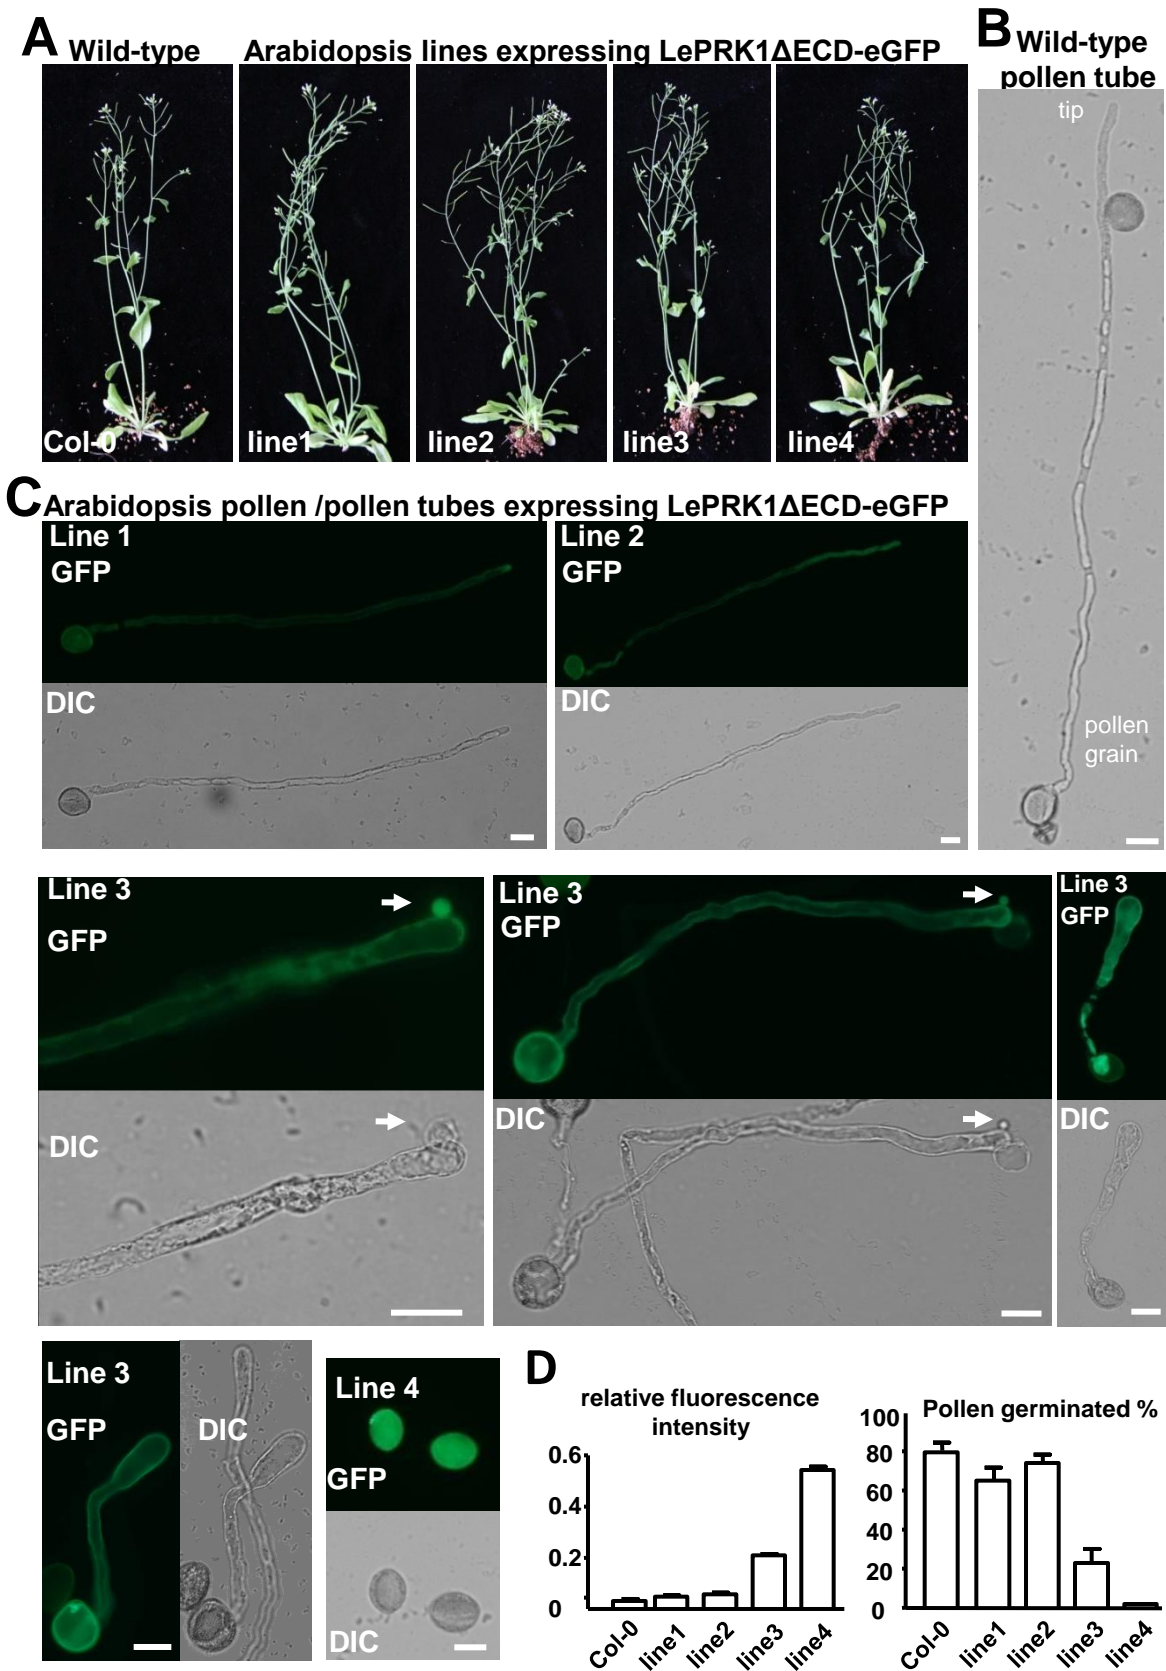

**Supplemental Figure 13.** Analysis of Arabidopsis lines expressing pLAT52-LePRK1ΔECD-eGFP.

(A) Representative images of Arabidopsis transgenic plants with LePRK1ΔECD-eGFP driven by LAT52 promotor and Arabidopsis thaliana Col-0 plant.

(B) A representative pollen tube of wild-type Arabidopsis.

(C) Representative pollen/ pollen tubes from Arabidopsis transgenic lines with LePRK1ΔECD-eGFP. Arrow point to blebs.

(D) Measurements of mature pollen relative fluorescence intensity and germination percentage from Arabidopsis. Scale bar= 20 μm.

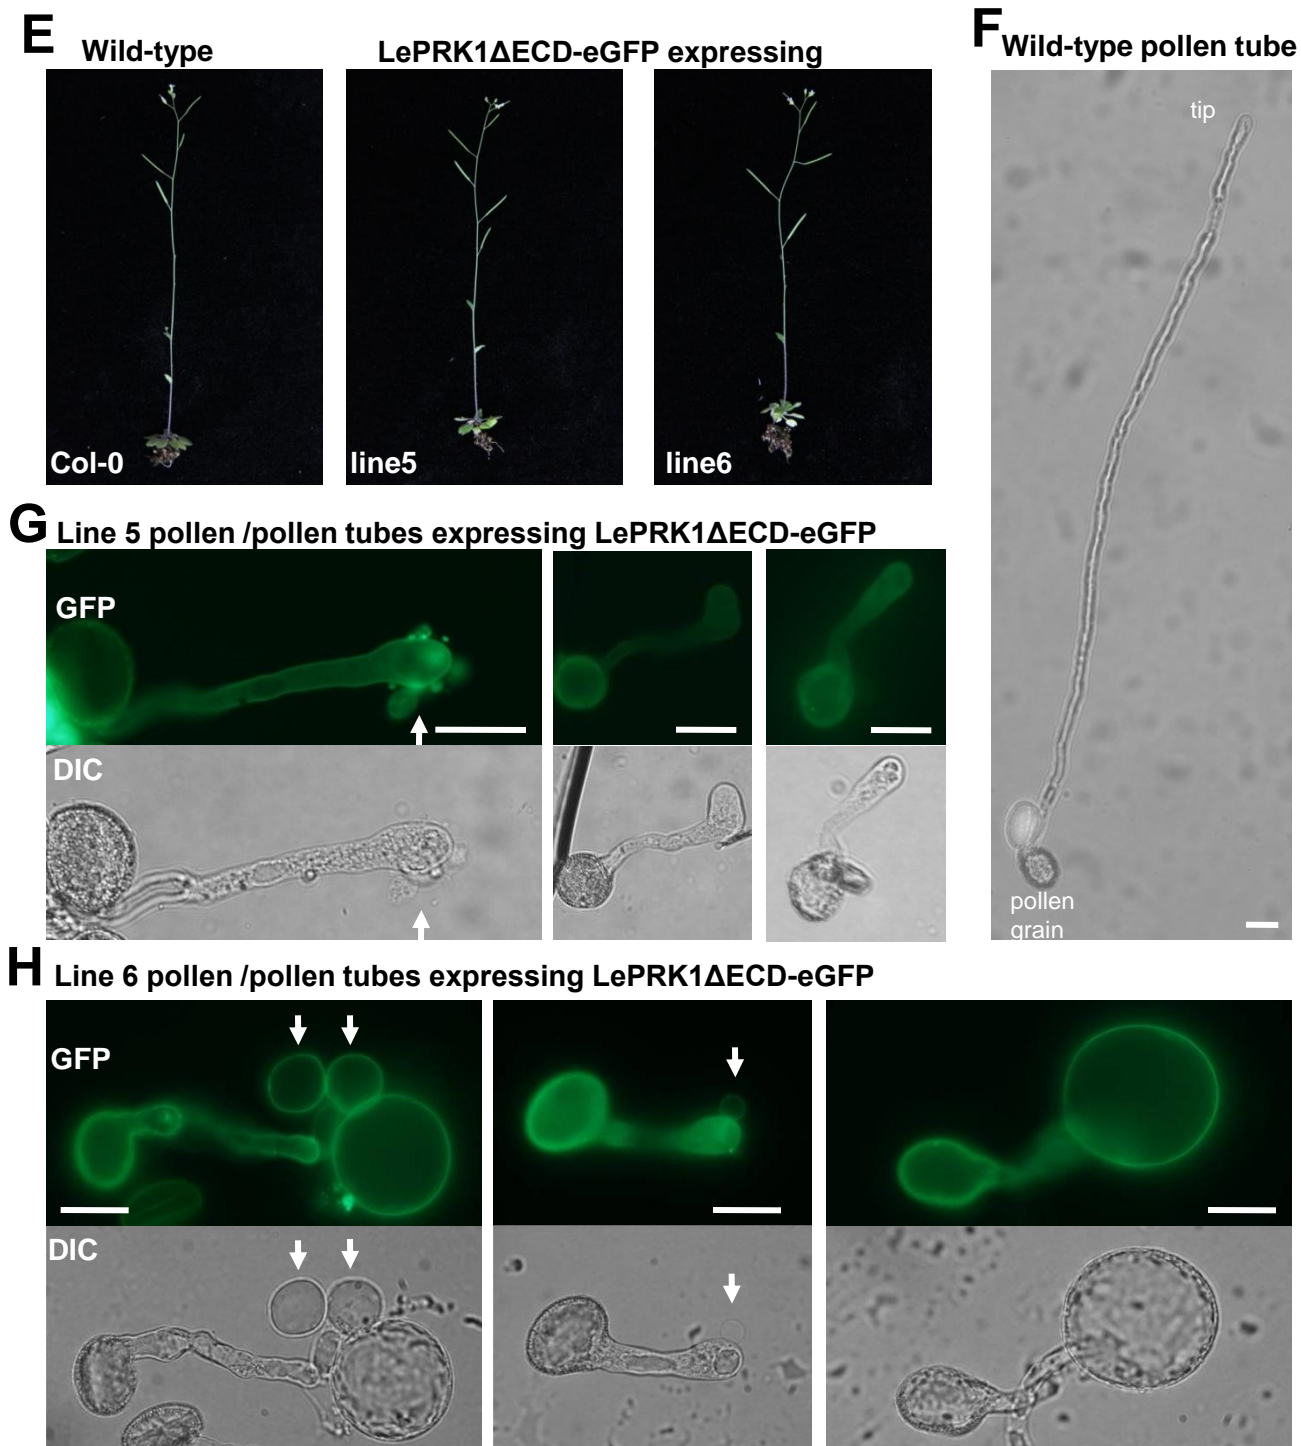

**Supplemental Figure 13.** (continued)

(E) Representative images of Arabidopsis transgenic plants with LePRK1ΔECD-eGFP driven by LAT52 promotor and Arabidopsis thaliana Col-0 plant.

(F) A representative pollen tube of wild-type Arabidopsis.

(G) (H) Representative pollen/ pollen tubes from Arabidopsis transgenic lines with LePRK1ΔECD-eGFP. Arrows point to blebs. Scale bar= 20 μm.

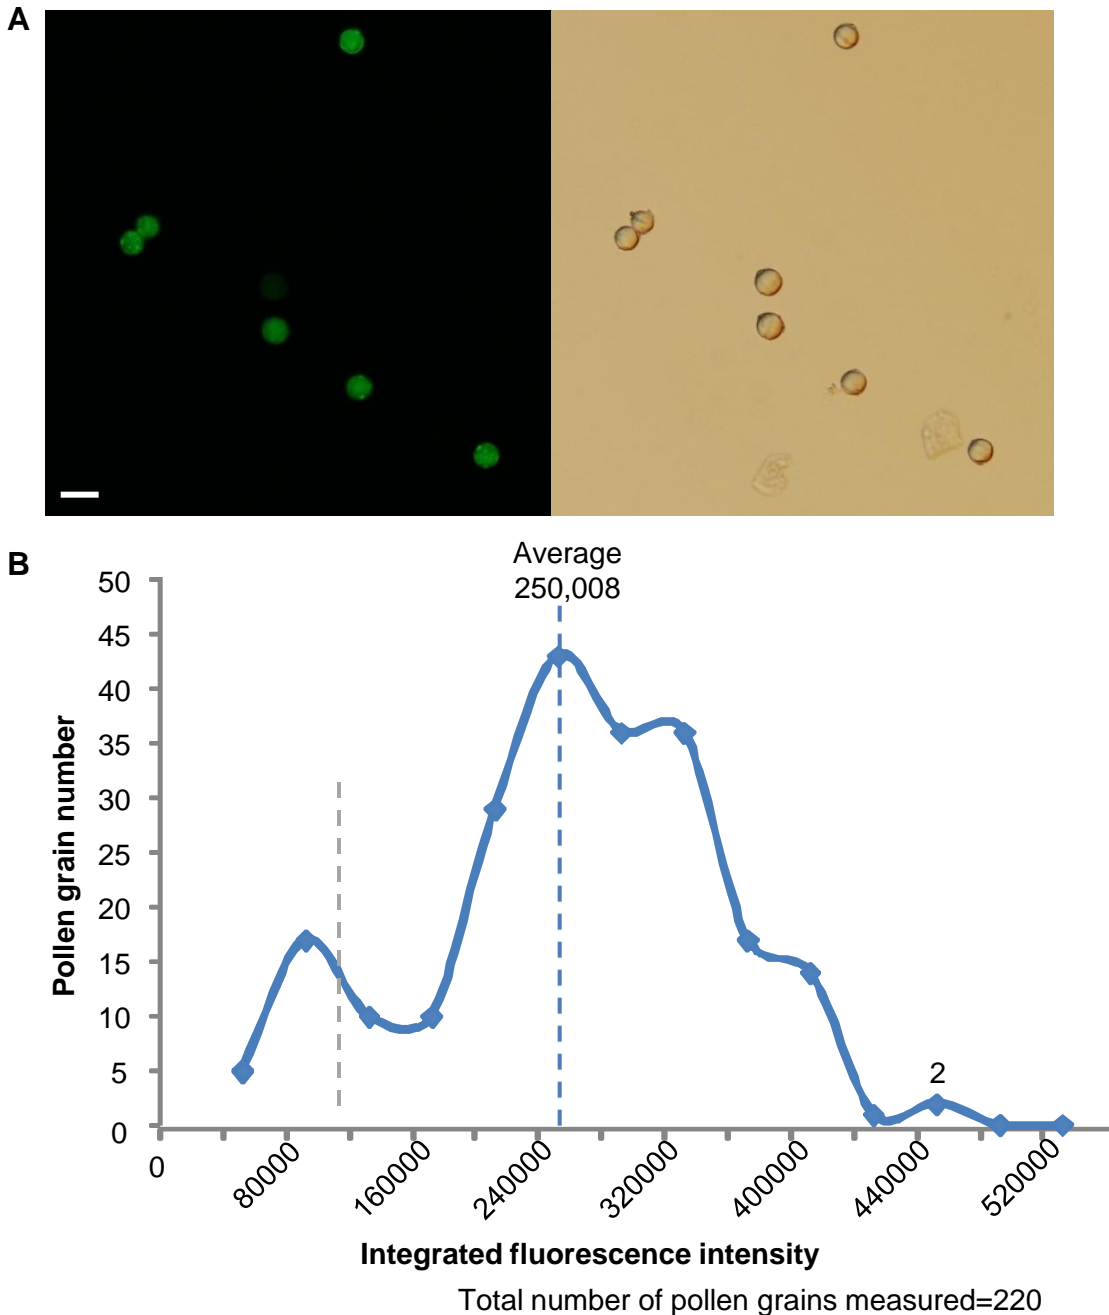

**Supplemental Figure 14.** Fluorescence variation among individual pollen from a single flower of a homozygous LePRK1 $\Delta$ ECD-eGFP transgenic tomato plant.

Pollen grains from a single flower of homozygous plant expressing LePRK1 $\Delta$ ECD-eGFP driven by the LAT52 promoter were hydrated in pollen germination medium, and then imaged within 30min using an Olympus BX51 epifluorescence microscope (20 ms exposure in the GFP channel). (A) shows a representative view. GFP signal of 220 pollen grains were measured using Image J Elliptical tool. (B) shows the distribution of LePRK1 $\Delta$ ECD-eGFP expression levels represented by integrated intensities (background subtracted). 22 pollen (left to the gray broken line, 10%), whose expression level was below 80,000, were considered dead. Two pollen with highest integrated intensities (443,267 and 454,348) were about 1.8 fold of the average intensities.



## Supplemental Table 1. Constructs

| Use                                          | Construct                         | Plasmid name | Insert or PCR product                              | Primers            | Template           | Plasmid backbone | Cloning method             |
|----------------------------------------------|-----------------------------------|--------------|----------------------------------------------------|--------------------|--------------------|------------------|----------------------------|
| Transient expression in tobacco pollen tubes | ProLAT52:eGFP                     | W33          | Previously generated in Zhang <i>et al.</i> , 2008 |                    |                    |                  |                            |
|                                              | ProLAT52:mRFP                     | Pzd-05       |                                                    |                    |                    |                  |                            |
|                                              | ProLAT52:LePRK1-eGFP              | W42          | LePRK1                                             | P1/P2              | LePRK1             | W33              | NcoI/SacI                  |
|                                              | ProLAT52:LePRK1-mRFP              | Pzd-06       | LePRK1                                             | P1/P2              | LePRK1             | Pzd-05           | NcoI/SacI                  |
|                                              | ProLAT52:LePRK2-eGFP              | K2GFP        | LePRK2                                             | P3/P4              | LePRK2             | W33              | NcoI/Aor51HI               |
|                                              | ProLAT52:LePRK2-mRFP              | Pzd-07       | LePRK2                                             | P5/P6              | LePRK2             | Pzd-05           | NcoI/SacI                  |
|                                              | ProLAT52:KPP-mRFP                 | Pzd-15       | KPP                                                | P7/P8              | KPP cDNA           | Pzd-05           | NcoI/NheI                  |
|                                              | ProLAT52:LePRK3-eGFP              | K3GFP        | LePRK3                                             | P9/P10             | LePRK3             | W33              | NcoI/Aor51HI               |
|                                              | ProLAT52:LePRK4-eGFP              | K4GFP        | LePRK4                                             | P11/P12            | LePRK4             | W33              | NcoI/Aor51HI               |
|                                              | ProLAT52:LePRK5-eGFP              | K5GFP        | LePRK5                                             | P13/P14            | LePRK5             | W33              | NcoI/Aor51HI               |
|                                              | ProLAT52:LePRK1-KC-mRFP           | G134         | LePRK1-KC                                          | P15/P16            | LePRK1             | Pzd-05           | NcoI/SacI                  |
|                                              | ProLAT52:LePRK1-JKC-eGFP          | G22          | LePRK1-JKC                                         | P17/P16            | LePRK1 cDNA        | W33              | NcoI/SacI                  |
|                                              | ProLAT52:LePRK1-JK-eGFP           | G23          | LePRK1-JK                                          | P17/P18            | LePRK1             | W33              | NcoI/SacI                  |
|                                              | ProLAT52:LePRK1-KC-eGFP           | G24          | LePRK1-KC                                          | P15/P16            | LePRK1             | W33              | NcoI/SacI                  |
|                                              | ProLAT52:LePRK1ΔECD-eGFP          | G135         | LePRK1ΔECD                                         | P19/P16            | LePRK1 cDNA        | W33              | NcoI/SacI                  |
|                                              | ProLAT52:LePRK1ΔC-eGFP            | G21          | LePRK1ΔC                                           | P1/P20             | LePRK1             | W33              | NcoI/SacI                  |
|                                              | ProLAT52:LePRK1ΔKC-eGFP           | LePRK1dKCGFP | LePRK1ΔKC                                          | P58/P59            | LePRK1 cDNA        | W33              | NcoI/Aor51HI               |
|                                              | ProLAT52:mLePRK1-eGFP             | mLePRK1GFP   | mLePRK1                                            | P60/P61            | W42                | W42              | Fast mutagenesis           |
|                                              | ProLAT52:Lifect-eGFP              | LifectGFP    | Lifect-eGFP                                        | P62/P63            | W33                | W33              | NcoI/SalI                  |
|                                              | ProLAT52:mRFP-mTalin              | G44          | mTalin/mRFP                                        | P66/P67<br>P68/P69 | Pzd-05/mTalin      | Pzd-05           | EcoRI/BamHI<br>BamHI       |
|                                              | ProLAT52:PLIM2a-eGFP              | LIM2aGFP     | PLIM2a                                             | P21/P22            | PLIM2a cDNA        | W33              | NcoI/Aor51HI               |
|                                              | ProLAT52:PLIM2a-mRFP              | G145         | PLIM2a                                             | P23/P24            | PLIM2a cDNA        | Pzd-05           | NheI                       |
|                                              | ProLAT52:PLIM2b-mRFP              | LIM2bRFP     | PLIM2b                                             | P25/P26            | PLIM2b cDNA        | Pzd-05           | SacI/NheI                  |
|                                              | ProLAT52:PLIM2c-mRFP              | LIM2cRFP     | PLIM2c                                             | P27/P28            | PLIM2c cDNA        | Pzd-05           | SacI/NheI                  |
|                                              | ProLAT52:SIδLIM2-eGFP             | δLIM2GFP     | SIδLIM2                                            | P70/P71            | SIδLIM2            | W33              | NcoI/Aor51HI               |
|                                              | ProLAT52:eGFP-SIADF               | G104         | SIADF                                              | P29/P30<br>P31/P32 | SI ADF cDNA<br>W33 | W33              | NcoI/Aor51HI<br>NotI/BamHI |
|                                              | ProLePRK1:eGFP                    | G87          | LePRK1 promoter                                    | P72/P73            | LePRK1             | W33              | PstI/NcoI                  |
|                                              | ProLePRK1:LePRK1-eGFP             | G88          | LePRK1 promoter                                    | P74/P75            | LePRK1             | W42              | PstI/NcoI                  |
|                                              | ProLAT52:LePRK1-<br>ProLAT52:eGFP | G39          | LePRK1                                             | P1/P33             | LePRK1 cDNA        | w33              | NcoI/NheI                  |
|                                              | ProLAT52:YN                       | YN           | YN                                                 | P34/P35            | YFP                | W33              | NcoI/BamHI                 |
|                                              | ProLAT52:YC                       | YC           | YC                                                 | P36/P37            | YFP                | W33              | NcoI/BamHI                 |
|                                              | ProLAT52:KPP-YN                   | K291         | YN                                                 | P38/P39            | YFP                | Pzd-15           | NheI/BamHI                 |
|                                              | ProLAT52:KPP-YC                   | K299         | YC                                                 | P40/P41            | YFP                | Pzd-15           | NheI/BamHI                 |
|                                              | ProLAT52:SI ADF-YN                | ADF-YN       | SI ADF                                             | P42/P43            | SI ADF cDNA        | K307             | NcoI/Aor51HI               |
|                                              | ProLAT52:SI δLIM2-YN              | δLIM2YN      | YN                                                 | P38/P39            | YFP                | δLIM2GFP         | NheI/BamHI                 |
|                                              | ProLAT52:PLIM2a-YN                | G151         | YN                                                 | P44/P45            | YFP                | G145             | NotI/BamHI                 |
|                                              | ProLAT52:PLIM2a-YC                | G152         | YC                                                 | P46/P47            | YFP                | G145             | NotI/BamHI                 |
|                                              | ProLAT52:LePRK1-YN                | K307         | YN                                                 | P38/P39            | YFP                | W42              | NheI/BamHI                 |
|                                              | ProLAT52:LePRK1-YC                | K309         | YC                                                 | P40/P41            | YFP                | W42              | NheI/BamHI                 |
|                                              | ProLAT52:LePRK2-YN                | K308         | YN                                                 | P38/P39            | YFP                | K2GFP            | NheI/BamHI                 |
|                                              | ProLAT52:LePRK2-YC                | K310         | YC                                                 | P40/P41            | YFP                | K2GFP            | NheI/BamHI                 |
|                                              | ProLAT52:LePRK1ΔC-YC              | G121         | YC                                                 | P40/P41            | YFP                | G21              | NheI/BamHI                 |
| ProLAT52:LePRK1-JKC-YC                       | G122                              | YC           | P40/P41                                            | YFP                | G22                | NheI/BamHI       |                            |
| ProLAT52:LePRK1-JK-YC                        | G123                              | YC           | P40/P41                                            | YFP                | G23                | NheI/BamHI       |                            |
| ProLAT52:LePRK1-KC-YC                        | G124                              | YC           | P40/P41                                            | YFP                | G24                | NheI/BamHI       |                            |
| ProLAT52:LePRK1ΔC-YN                         | G115                              | YN           | P38/P39                                            | YFP                | G21                | NheI/BamHI       |                            |
| ProLAT52:LePRK1-JKC-YN                       | G116                              | YN           | P38/P39                                            | YFP                | G22                | NheI/BamHI       |                            |
| ProLAT52:LePRK1-JK-YN                        | G117                              | YN           | P38/P39                                            | YFP                | G23                | NheI/BamHI       |                            |
| ProLAT52:LePRK1-KC-YN                        | G118                              | YN           | P38/P39                                            | YFP                | G24                | NheI/BamHI       |                            |

**Supplemental Table 1. Constructs (continued)**

|                                                         |                                      |         |                                         |                                                    |             |              |                         |
|---------------------------------------------------------|--------------------------------------|---------|-----------------------------------------|----------------------------------------------------|-------------|--------------|-------------------------|
| <b>Recombinant protein expression in <i>E. coli</i></b> | His-PLIM2a                           | G154    | PLIM2a                                  | P48/P49                                            | PLIM2a cDNA | pET28a       | NdeI/XhoI               |
|                                                         | His-KPP                              | K526    | KPP                                     | P50/P51                                            | KPP cDNA    | pET28a       | NdeI/BamHI              |
|                                                         | GST-KPP                              | K386    | KPP                                     | P52/P53                                            | KPP cDNA    | pGEX4T3      | SacI/NotI               |
|                                                         | GST                                  | pGEX4T3 | GST only                                |                                                    |             | pGEX4T3      |                         |
| <b>Yeast two hybrid</b>                                 | AD-PLIM2a                            | G156    | PLIM2a                                  | P54/P55                                            | PLIM2a cDNA | pGADT7       | NdeI/XhoI               |
|                                                         | BD-KPP                               | K413B   | KPP                                     | P56/P57                                            | KPP cDNA    | pGBKT7       | NcoI/NotI               |
|                                                         | AD                                   | pGADT7  |                                         |                                                    |             | pGADT7       |                         |
|                                                         | BD                                   | pGBKT7  |                                         |                                                    |             | pGBKT7       |                         |
| <b>Stable expression in transgenic plants</b>           | LePRK1-RNAi-mRFP                     | 09-114  | LePRK1 RNAi casset                      | P76/P77<br>P78/P79                                 | LePRK1 cDNA | 09-71        | XhoI/EcoRV<br>SpeI/NdeI |
|                                                         | ProLAT52:LAT52 intron:35S terminator | 09-71   | ProLAT52:LAT52 intron:35S terminator    | Previously generated in Huang <i>et al.</i> , 2014 |             |              |                         |
|                                                         | ProLAT52:eGFP                        | W33T    | ProLAT52:eGFP:35S terminator            |                                                    | W33         | pCAMBIA 2300 | Sall/HindIII            |
|                                                         | ProLAT52:LePRK1-eGFP                 | W42T    | ProLAT52:LePRK1-eGFP:35S terminator     |                                                    | W42         | pCAMBIA 2300 | Sall/HindIII            |
|                                                         | ProLAT52:mLePRK1-eGFP                | G6      | ProLAT52:mLePRK1-eGFP:35S terminator    |                                                    | mLePRK1GFP  | pCAMBIA 2300 | Sall/HindIII            |
|                                                         | ProLAT52:LePRK1ΔECD-eGFP             | G35     | ProLAT52:LePRK1ΔECD-eGFP:35S terminator |                                                    | G135        | pCAMBIA 2300 | Sall/HindIII            |
|                                                         | ProLAT52:LePRK1ΔC-mRFP               | G70     | ProLAT52:LePRK1ΔC-mRFP:35S terminator   |                                                    | G130        | pCAMBIA 2300 | Sall/HindIII            |

**Huang, W.J., Liu, H.K., McCormick, S., and Tang, W.H.** (2014). Tomato pistil factor STIG1 promotes in vivo pollen tube growth by binding to phosphatidylinositol 3-phosphate and the extracellular domain of the pollen receptor kinase LePRK2. Plant Cell doi: 10.1105/tpc.114.123281

**Zhang, D., Wengier, D., Shuai, B., Gui, C.P., Muschietti, J., McCormick, S., and Tang, W.H.** (2008). The pollen receptor kinase LePRK2 mediates growth-promoting signals and positively regulates pollen germination and tube growth. Plant Physiol. **148**: 1368–1379.

## Supplemental Table 2. Primers

| Primer | Sequence (5'-3')                                                                             | RT-PCR primers                                                                         |
|--------|----------------------------------------------------------------------------------------------|----------------------------------------------------------------------------------------|
| P1     | CCATGGCGGGTGGCTTATCGTTATAG                                                                   | The primers used to amplify a 100-bp fragment of LePRK2                                |
| P2     | GAGCTCATGTTTCATCGAAAACCTGAGTATAA                                                             | F CTTGCCTGATTTGTTGAAAGCC                                                               |
| P3     | CCATGGCCATGTCATCACAAAAAACAACAAAAACAACA                                                       | R AACAACCATGACAGGGCCA                                                                  |
| P4     | AGCGCTTCTTGAAGTATGCATATTGCTCAACTTCATTA                                                       | The primers used to amplify a 122-bp fragment of LePRK1                                |
| P5     | CCATGGCATTACAAAAAACAACAAAAACA                                                                | F GGCCCTGAAGTACAAGCAGTACAACA                                                           |
| P6     | GAGCTCCTTGAAGTATGCATATTGCTCAACT                                                              | R CGAACCAAAACACACCCTA                                                                  |
| P7     | CCATGGCGAGCTCGGTTTCGAGCAGTAGAGGAAG                                                           | The primers used to amplify a 123-bp fragment of <i>Sl Actin4</i> (Solyc04g011500.2.1) |
| P8     | GCTAGCGTGGCGTCTGTTGGACTTCTGGAA                                                               | F GCGAGAAATGTCAGGGACGT                                                                 |
| P9     | CCATGGCCGCTCATGTCCTTATTGTTTTATTG                                                             | R TGCCCATCTGGGAGCTCAT                                                                  |
| P10    | AGCGCTCATTAAATCTGTATCTCTTCTATCCTCCTTATGG                                                     |                                                                                        |
| P11    | CCATGGCCGCGCTTCCCTAACCCCTCATCTCCTTC                                                          |                                                                                        |
| P12    | AGCGCTTATTAACCTTATCTCTTCTATCCTCCTTAATGCTTCTTC                                                |                                                                                        |
| P13    | CCATGGCCATGACGGAGGTGGAGGATGCCGGCCTGT                                                         |                                                                                        |
| P14    | AGCGCTAACTCCATCATCAACTTGATCGTCTTGTCAATTAAGGC                                                 |                                                                                        |
| P15    | CCATGGATCTATTAAGGCTTCAGCTG                                                                   |                                                                                        |
| P16    | GAGCTCATGTTTCATCGAAAACCTGAGTATAATCATCGG                                                      |                                                                                        |
| P17    | CCATGGTTCTGTCGGGGCAAGCAGACAC                                                                 |                                                                                        |
| P18    | GAGCTCTCAATCCTTCCATTGCTTCCTT                                                                 |                                                                                        |
| P19    | CCATGGCAATTATTTGGTGGTTATCGCAGTTG                                                             |                                                                                        |
| P20    | GAGCTCTCAATCCTTCCATTGCTTCTTTATGTCAAACCTCTTTTCA                                               |                                                                                        |
| P21    | CCATGGCATTACAGGAACATTGGATAAATGCTCAGCTTGT                                                     |                                                                                        |
| P22    | AGCGCTTGAATCTTGTGATTCCTCTGCATTTTCAGGCTCTTTA                                                  |                                                                                        |
| P23    | GCTAGCATGGCATTACAGGAACATTG                                                                   |                                                                                        |
| P24    | GCTAGCTGATTCCTTGTGATTCCTCTGCATT                                                              |                                                                                        |
| P25    | GAGCTCATGTCATTACAGGAACATTGGATAAATGCAAAGCTT                                                   |                                                                                        |
| P26    | GCTAGCTTCTTGTGACTCTTCTCATGAGGTTCTTTTCTGGTTGC                                                 |                                                                                        |
| P27    | GAGCTCATGGCATTACAGGGACATTGGATAAATGCAAAGCT                                                    |                                                                                        |
| P28    | GCTAGCAGATTGCTCATTTCATCATTAGGTTCTTCTCATCTGCCTT                                               |                                                                                        |
| P29    | CCATGGTGAGCAAGGGCGAGGAGCTGTTACCGGGGTGG                                                       |                                                                                        |
| P30    | AGCGCTTGTACAGCTCGTCCATGCCGAGAGTGATCCCGCGGGCG                                                 |                                                                                        |
| P31    | GC GGCCCGCATGGCAAATGCTGTGTCTGGAACGGCAGTAC                                                    |                                                                                        |
| P32    | GGATCCTTAGTAGGCTCGGATTTAATAAGATCTAAGCT                                                       |                                                                                        |
| P33    | GCTAGCTTAGTTCATCGAAAACCTGAGT                                                                 |                                                                                        |
| P34    | CCATGGTGAGCAAGGGCGAGGAGCTGTTACCGGGGTG                                                        |                                                                                        |
| P35    | GGATCCTTAGTCTCGATGTTGTGGCGGATCTTGAAGTTCACCTTGA                                               |                                                                                        |
| P36    | CCATGGGCAGCGTGCAGCTCGCCGACCACTAC                                                             |                                                                                        |
| P37    | GGATCCTCACTTGTACAGCTCGTCCATGCCGAGAGTGATCCCG                                                  |                                                                                        |
| P38    | GCTAGCGTGAGCAAGGGCGAGGAGCTGTTACCCGG                                                          |                                                                                        |
| P39    | GGATCCTTAGTCTCGATGTTGTGGCGGATCTTGAAGTT                                                       |                                                                                        |
| P40    | GCTAGCGGCAGCGTGCAGCTCGCCGACCACTACC                                                           |                                                                                        |
| P41    | GGATCCTCACTTGTACAGCTCGTCCATGCCGAGA                                                           |                                                                                        |
| P42    | CCATGGCAAATGCTGTGTCTGGAACGGCAGTAC                                                            |                                                                                        |
| P43    | AGCGCTGTAGGCTCGCGATTTAATAAGATCTAAGTCAATTTCACTAG                                              |                                                                                        |
| P44    | GC GGCCCGCGTGAGCAAGGGCGAGGAGCTGTTCAACC                                                       |                                                                                        |
| P45    | GGATCCTTAGTCTCGATGTTGTGGCGGATCTTG                                                            |                                                                                        |
| P46    | GCGGCCCGCGCAGCGTGCAGCTCGCCGACCACTACCAGC                                                      |                                                                                        |
| P47    | GGATCCTCACTTGTACAGCTCGTCCATGCCGA                                                             |                                                                                        |
| P48    | CTCGAGTCATGATCTTGTGATTCCTCTGCATTTTCAGGC                                                      |                                                                                        |
| P49    | CATATGGCATTACAGGAACATTGGATAAATGCTCAG                                                         |                                                                                        |
| P50    | CATATGATGGCGAGCTCGGTTTCGAGCAGTAGAGGAAGAGA                                                    |                                                                                        |
| P51    | GGATCCTTAGTGGCGTGTGTTGGACTTCTGGAACCAAGTTAAAT                                                 |                                                                                        |
| P52    | GAGCTCGGTTTCGAGCAGTAGAGGAAGAGAAATTA                                                          |                                                                                        |
| P53    | GCGGCCGCTTAGTGGCGTGTGTTGGACTTCTGGAACCAAGTT                                                   |                                                                                        |
| P54    | CATATGGCATTACAGGAACATTGGATAAATGC                                                             |                                                                                        |
| P55    | CTCGAGTCATGATCTTGTGATTCCTCTGCATT                                                             |                                                                                        |
| P56    | CCATGGCGAGCTCGGTTTCGAGCAGTAGAGGAAGAGAA                                                       |                                                                                        |
| P57    | GCGGCCGCTTAGTGGCGTGTGTTGGACTTCTGGAACCAAGTTAAAT                                               |                                                                                        |
| P58    | CCATGGCCATGTCGGTGGCTTATCGTTATAGCAA                                                           |                                                                                        |
| P59    | AGCGCTTAATAGATCTGGCAAATCAAATTTTCAAT                                                          |                                                                                        |
| P60    | TGCACTAAGCAGGGGACGCGTTATGTTGTCCGGAGGTTTAGGCAA<br>ATGAATAATGTA                                |                                                                                        |
| P61    | TACATTATTCATTTGCCATAAACCTCCGGACAACCAATACCGCTCCCCT<br>GCTTAGTGCA                              |                                                                                        |
| P62    | CCATGGGTGTCGAGATTTGATCAAGAAATCGAAAGCATCTCAAAG<br>GAAGAAACAACCTTTGATACAAAAGTTGTGGTGAGCAAGGGCG |                                                                                        |
| P63    | GTCGACTTACTTGTACAGCTCGTCCATGCCGAGAGTGATCCCGGCG                                               |                                                                                        |
| P66    | GAATTCATGGCCTCCTCCGAGGACGTCATCAAGGAG                                                         |                                                                                        |
| P67    | GGATCCGCGCCGGTGGAGTGGCGGCCCTCGGCGGCTCGTA                                                     |                                                                                        |
| P68    | GGATCCATCTAGAAAGCTGCCAAGTCCATCGCTGCAGCCAC                                                    |                                                                                        |
| P69    | GGATCCTTAGTCTCGTCTCGAAGCTCTGAAGGCAAGAACTT                                                    |                                                                                        |
| P70    | CCATGGCCATGTCAGTTTTGGTACCCAAACAAAATGCA                                                       |                                                                                        |
| P71    | AGCGCTATCTTGAAGTCTTCAACAGGAGGCTGTGGTGG                                                       |                                                                                        |
| P72    | CTGCAGGTCGGGTAACGTCCTCCACAACCACTTGGCAGTTGATC                                                 |                                                                                        |
| P73    | CCATGGTTGCATCAAAGCATTCCAATAATAGGTTTGGTGAACCTT<br>AAATCTCTA                                   |                                                                                        |
| P74    | CTGCAGGTCGGGAGTATCTTGTAGCCTTGCCTAGAGTCGTAGGTG                                                |                                                                                        |
| P75    | CCATGGATCTGGTGGTACTCTTTGCTTTAGTTATGACGTTCCAAG<br>AAGTTTG                                     |                                                                                        |
| P76    | CTCGAGATGTCGGTGGCTTATCGTTATAG                                                                |                                                                                        |
| P77    | GATATCGATTGTACCAAGATGAAGT                                                                    |                                                                                        |
| P78    | ACTAGTATGTCGGTGGCTTATCGTTATAG                                                                |                                                                                        |
| P79    | CATATGTGATTGTACCAAGATGAAGT                                                                   |                                                                                        |
